# Supplementary material
Source: publisher figshare collection journal article supplement (https://acs.figshare.com/ndownloader/files/4004377)

## Supplementary Information

# AnilinoMethylRhodamines: pH Sensitive Probes with Tunable Photophysical Properties by Substituent Effect

*Quinn A. Best, Chuangjun Liu, Paul D. VanHoven, Matthew E. McCarroll,  
and Colleen N. Scott\**

Department of Chemistry & Biochemistry, Southern Illinois University, Carbondale, IL  
62901-4409, USA

### Table of Content:

|                                                        |    |
|--------------------------------------------------------|----|
| pH Titration.....                                      | S2 |
| Structures of the various AnMR and AnMR6G analogs..... | S4 |
| Quantum yield studies.....                             | S5 |
| NMR Experiment for AMR.....                            | S6 |
| NMR Spectra of Compounds.....                          | S7 |

## pH Titration Spectra

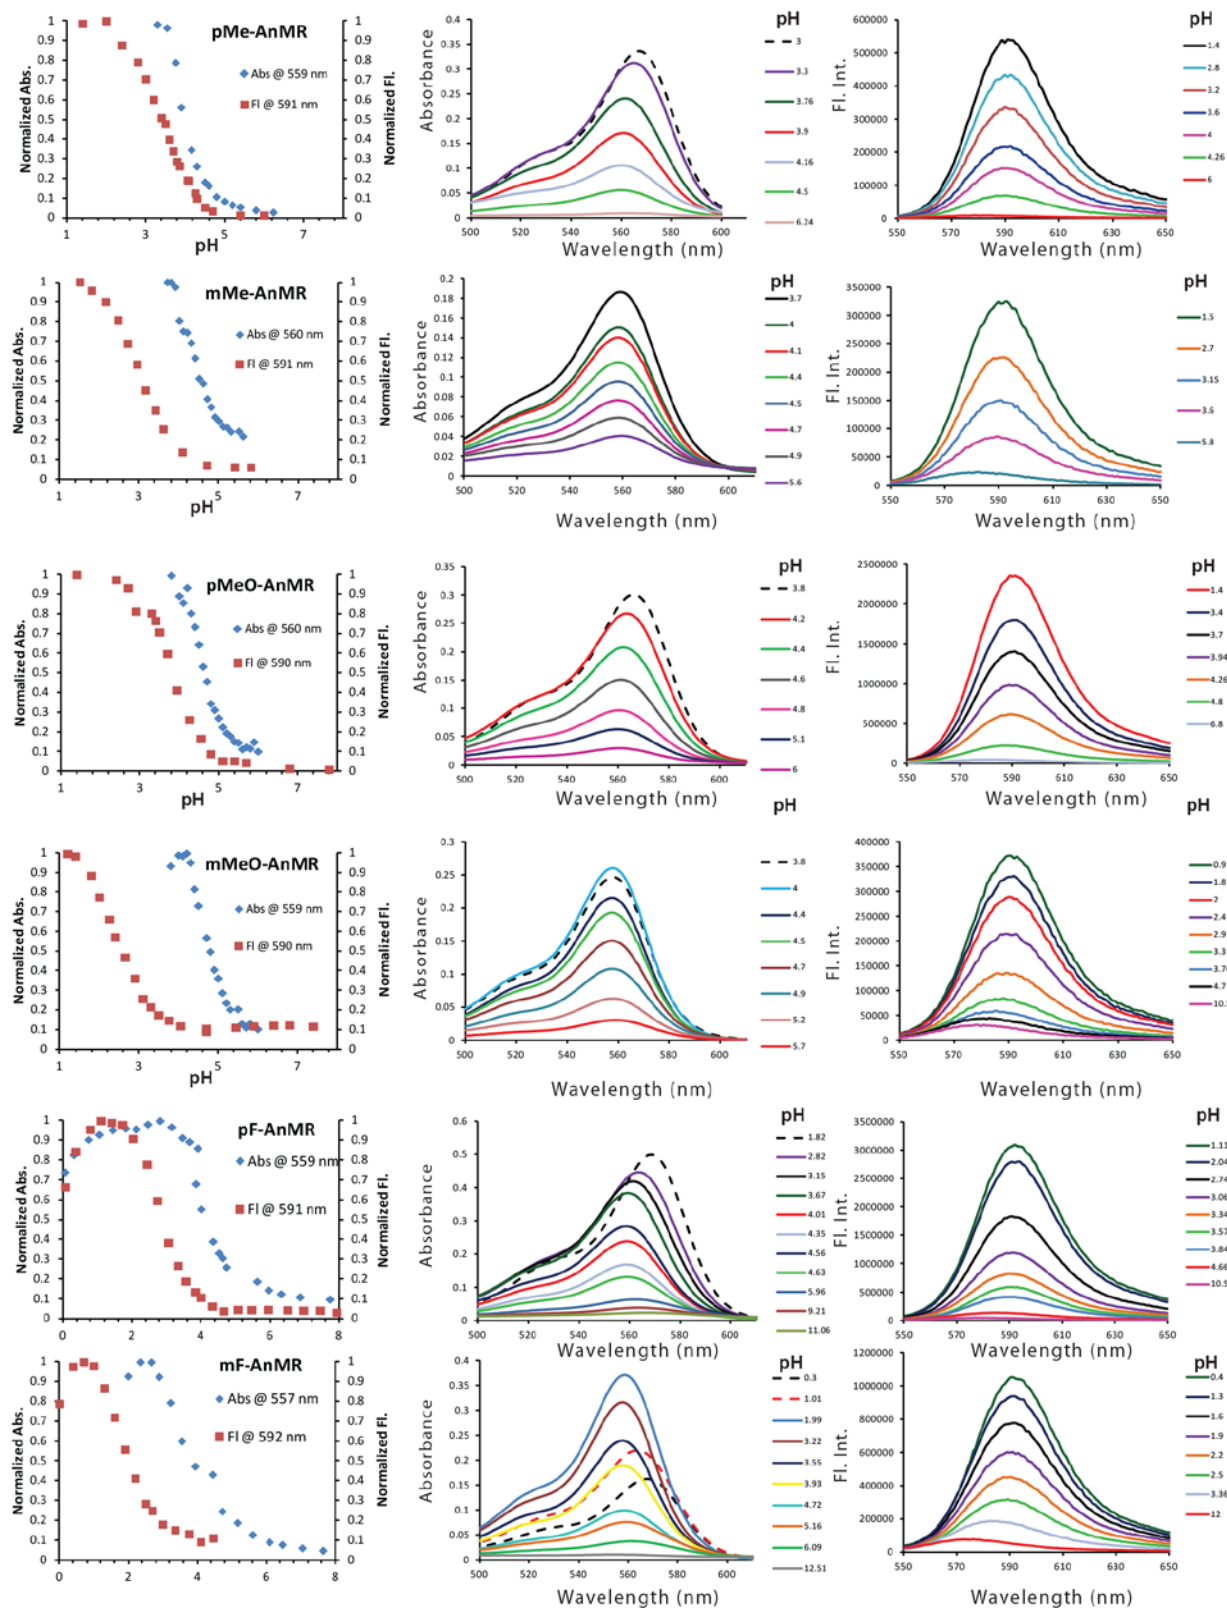

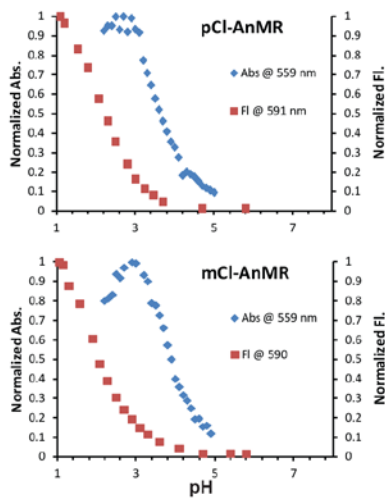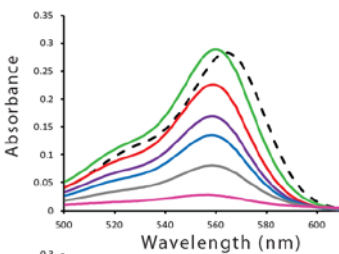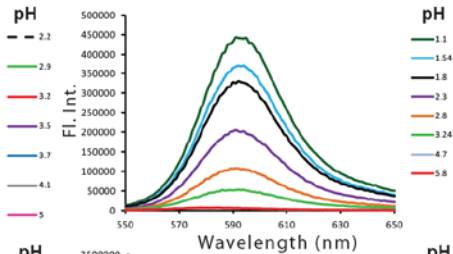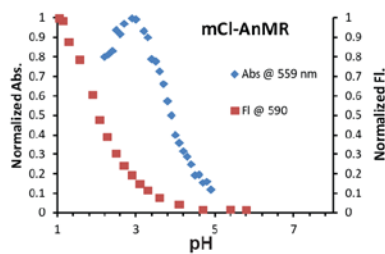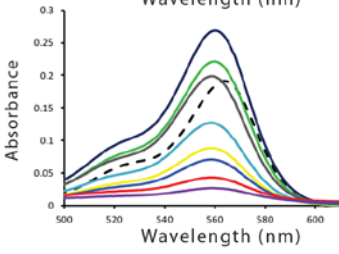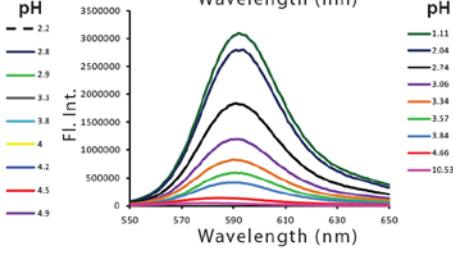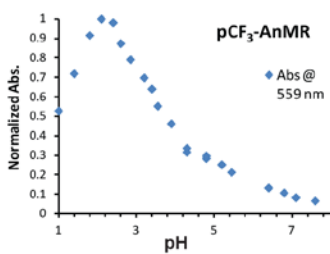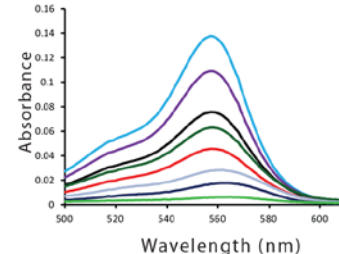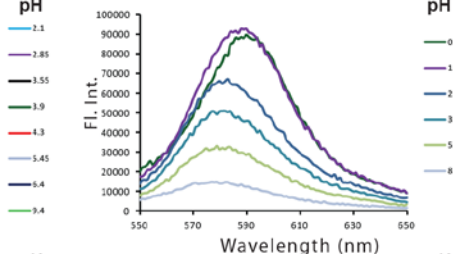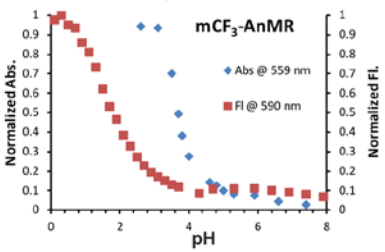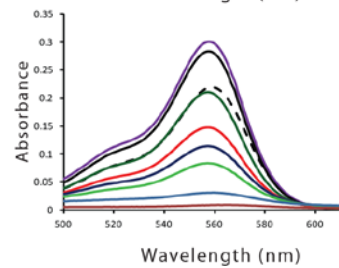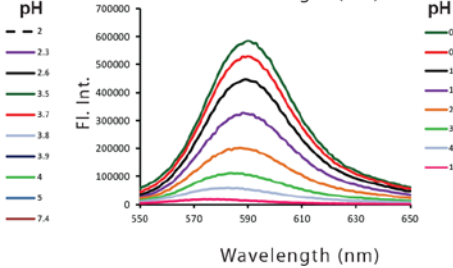

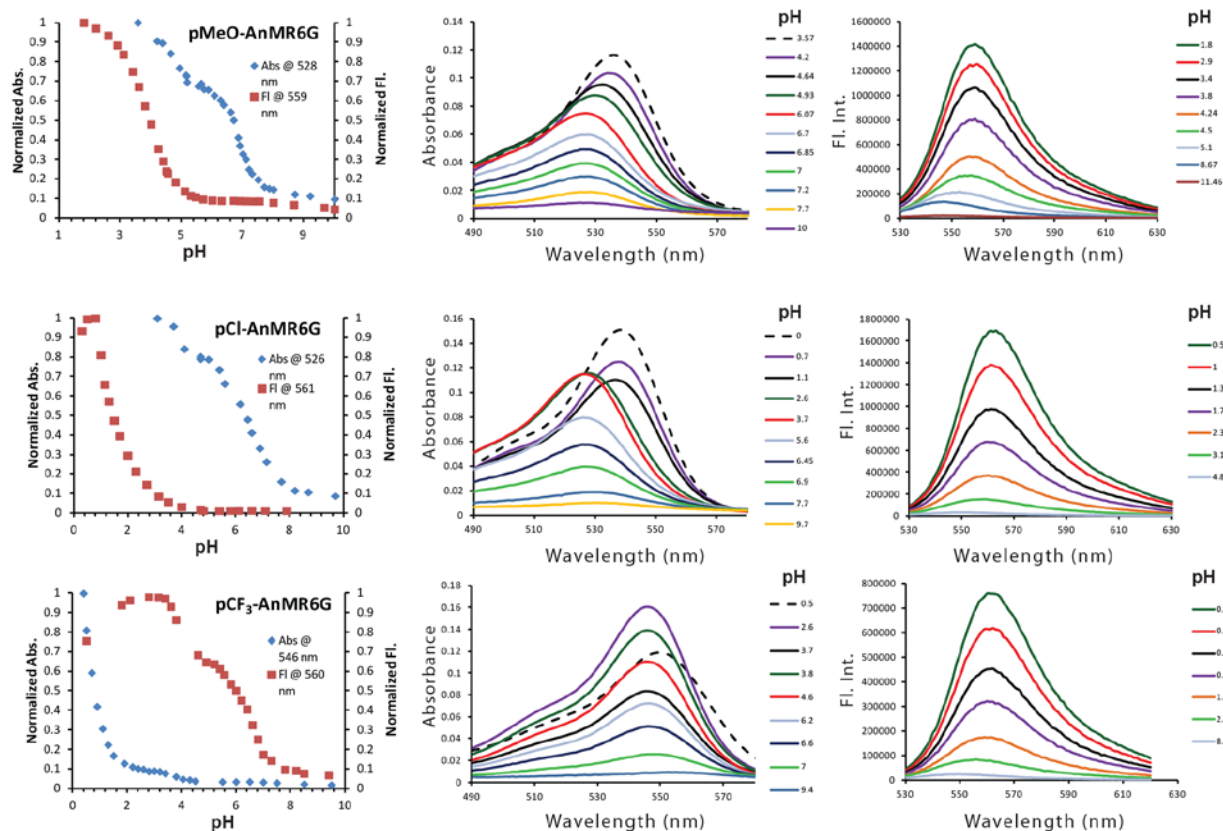

### Structures of the various AnMR and AnMR6G analogs.

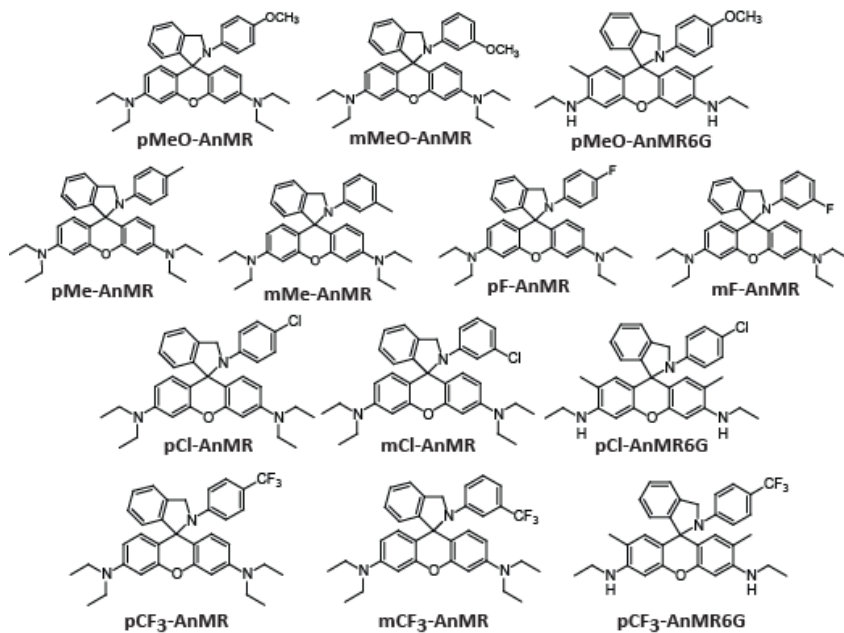

Quantum yield studies: pMeO-AnMR and pMeO-AnMR6G were tested using rhodamine B as the standard. Each compound was prepared at 0.5, 0.75, & 1.0  $\mu\text{M}$  concentration with the AnMR compounds in water (pH 1.5) and rhodamine B in ethanol. The quantum yield of rhodamine B in ethanol is 0.49. The quantum yields found for pMeO-AnMR and pMeO-AnMR6G are 0.14 and 0.65 respectively.

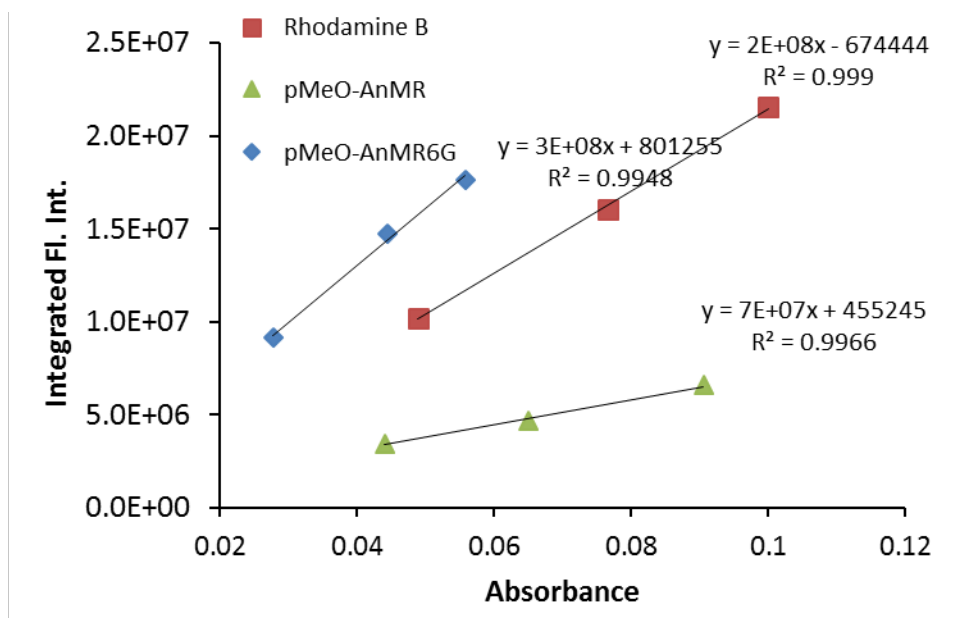

## NMR Experiment for AMR

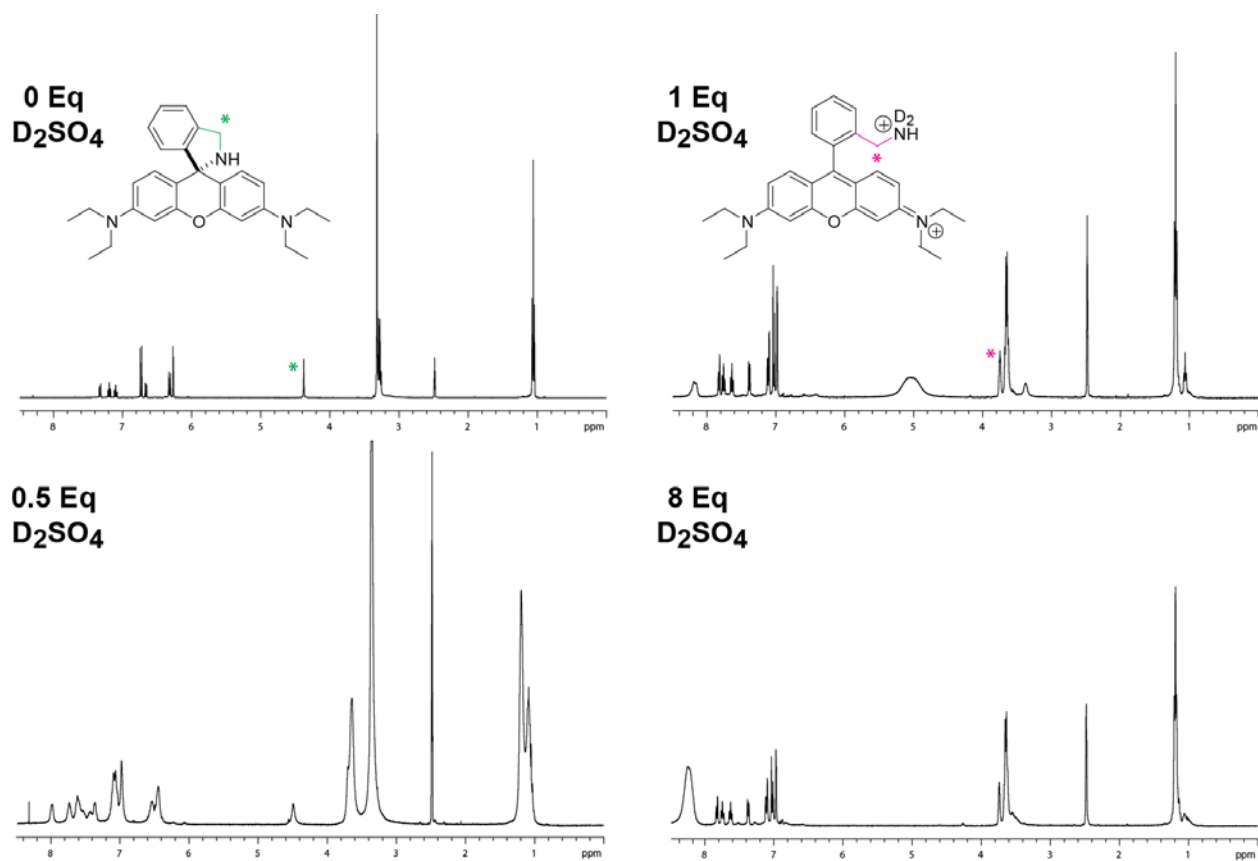

**Figure 1.**  $^1\text{H}$ -NMR titration of a 0.5 mM solution of **AMR** in  $d_6$ -DMSO with  $\text{D}_2\text{SO}_4$ .

## NMR Spectra of Compounds

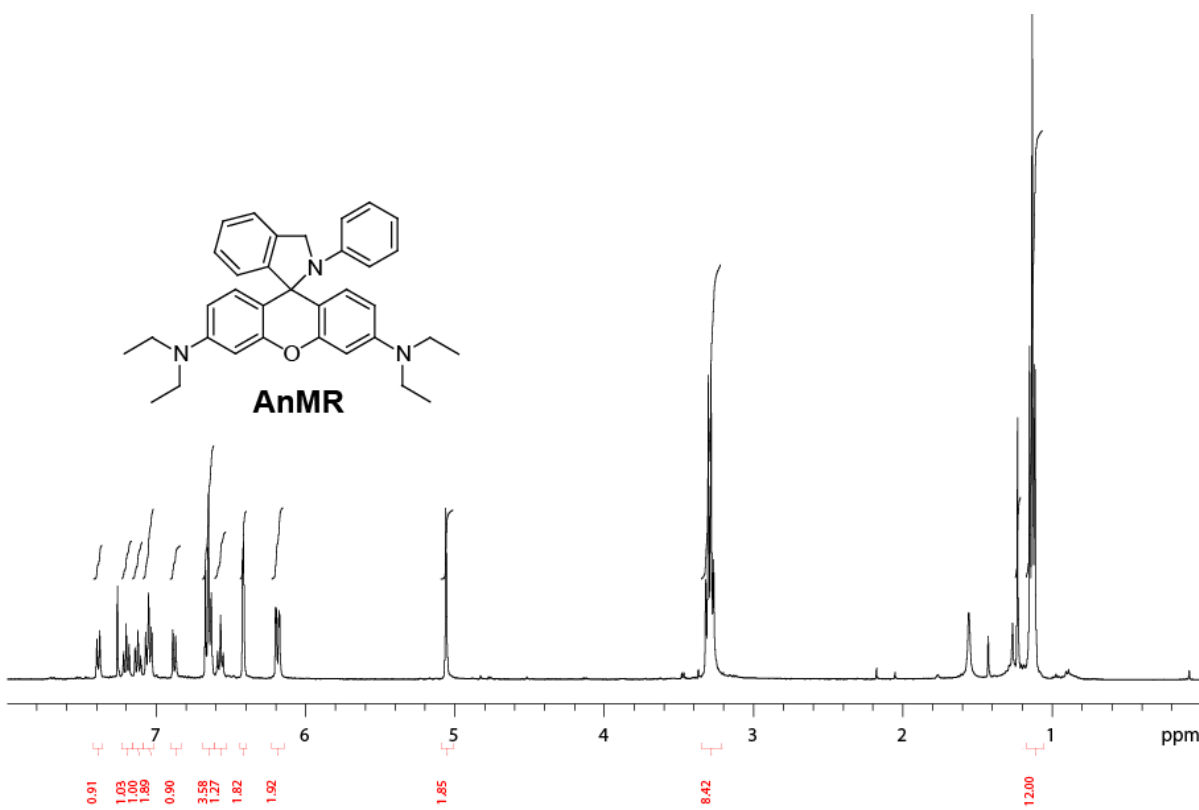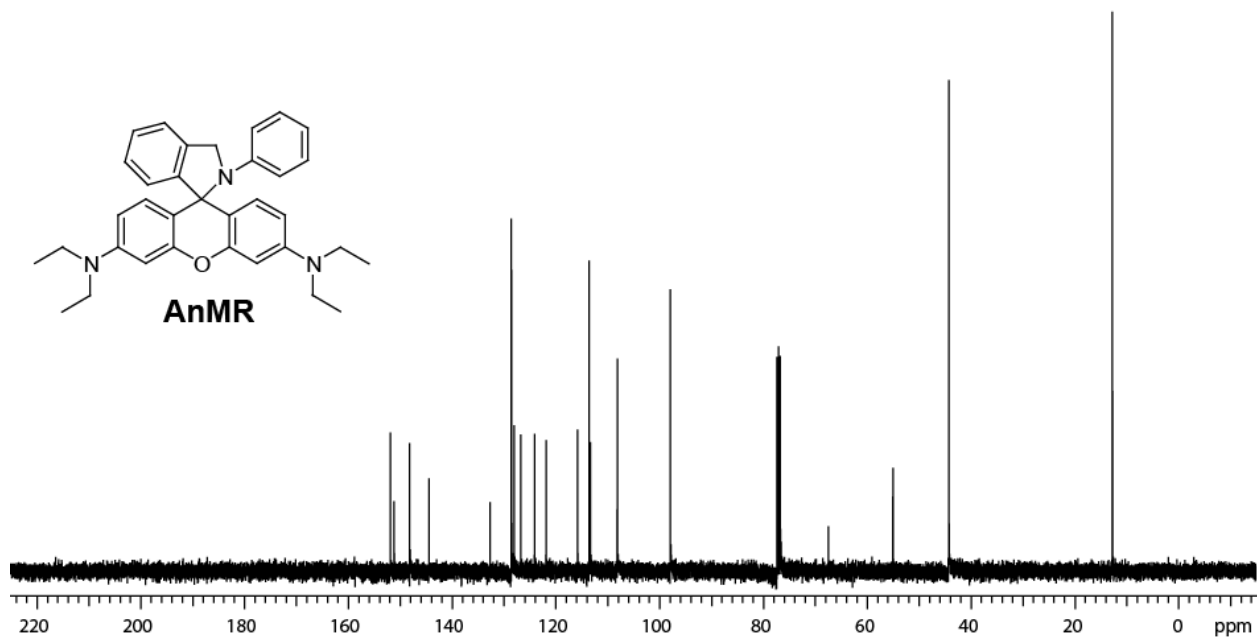

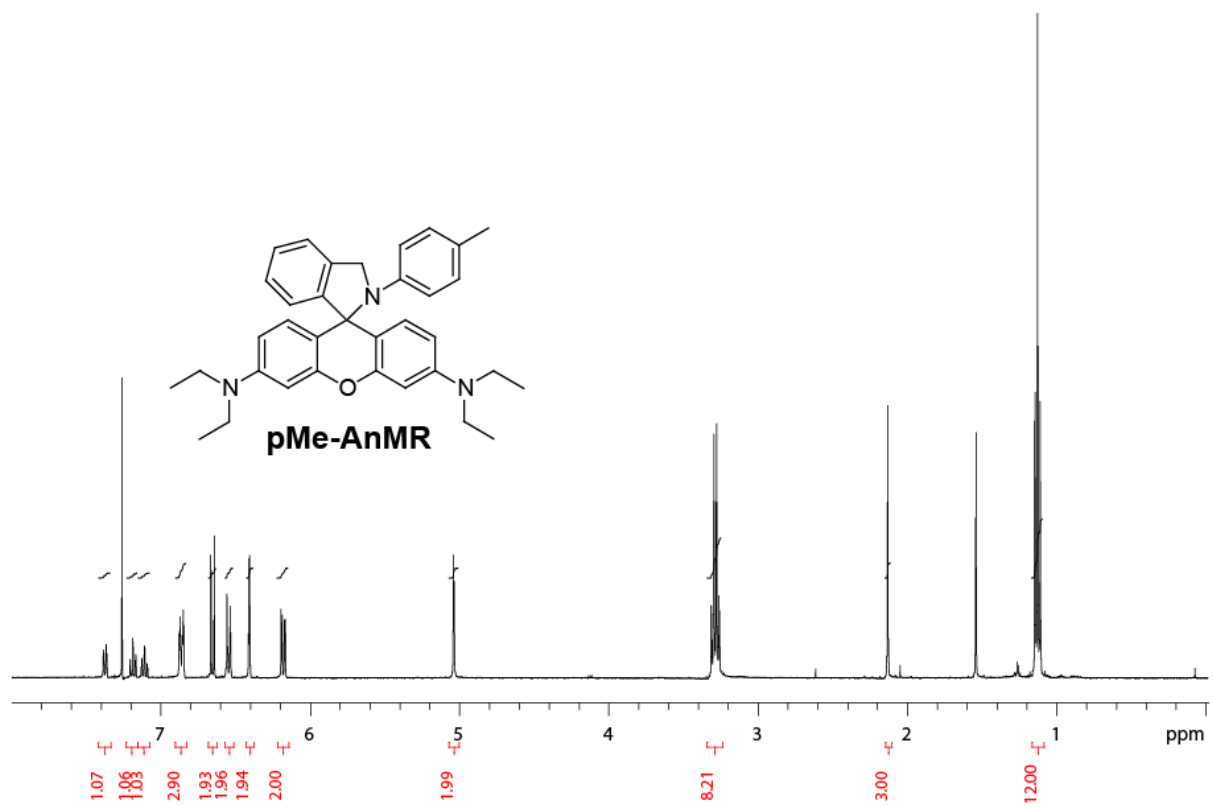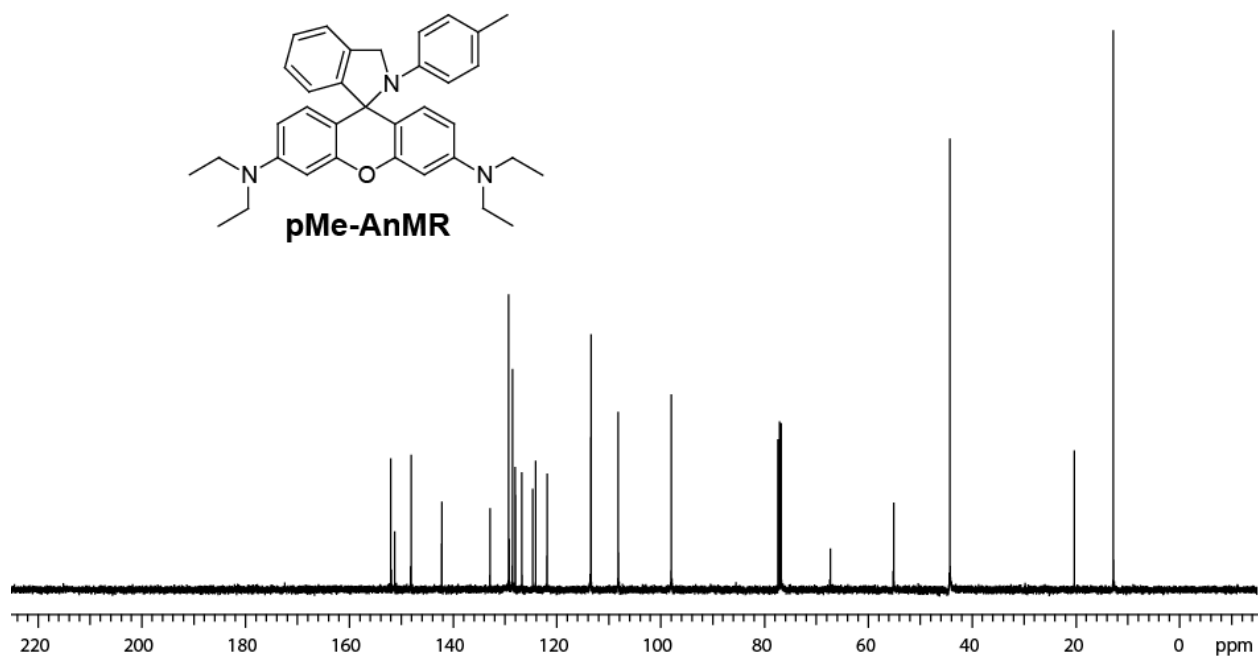



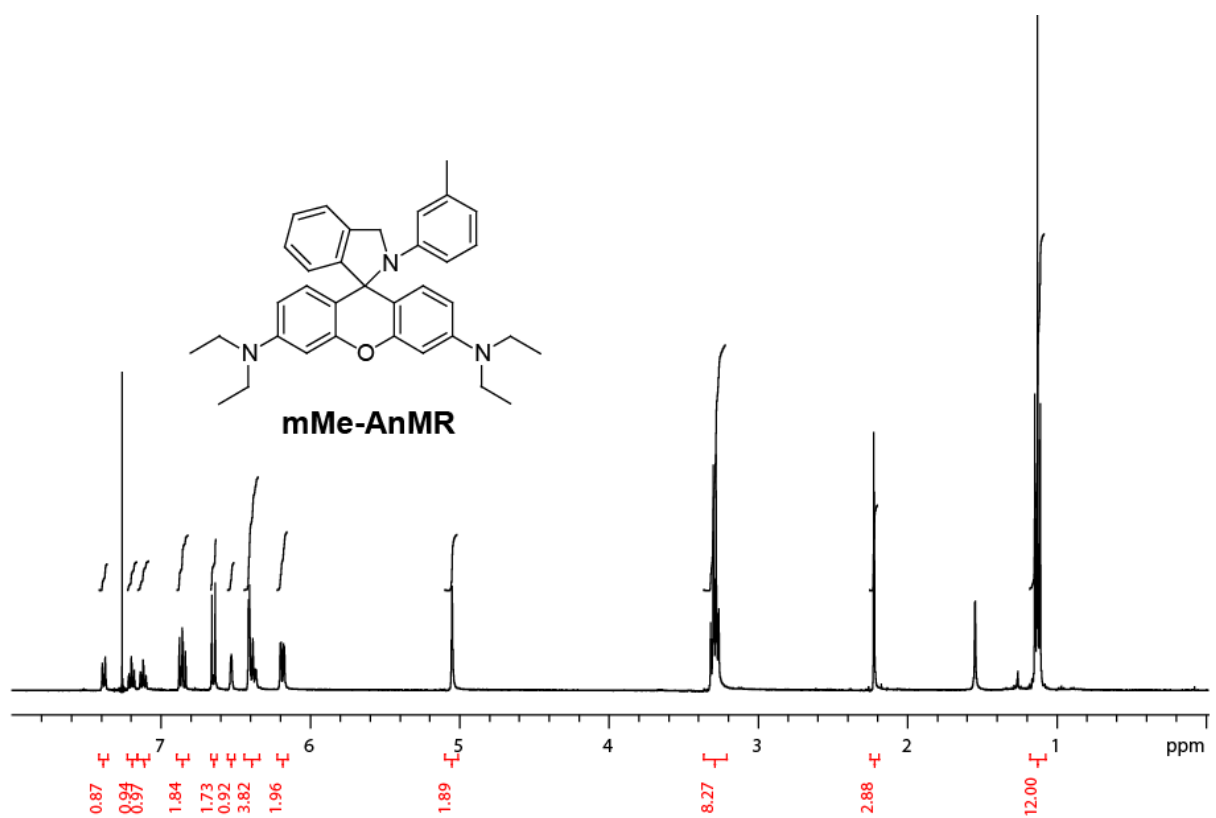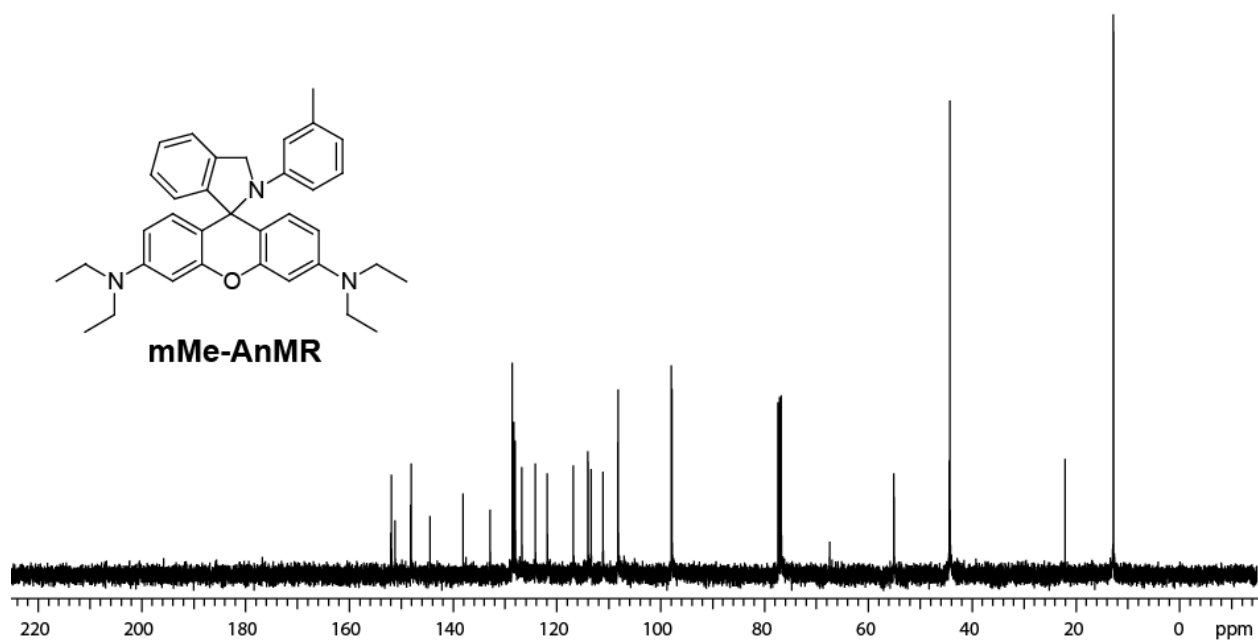

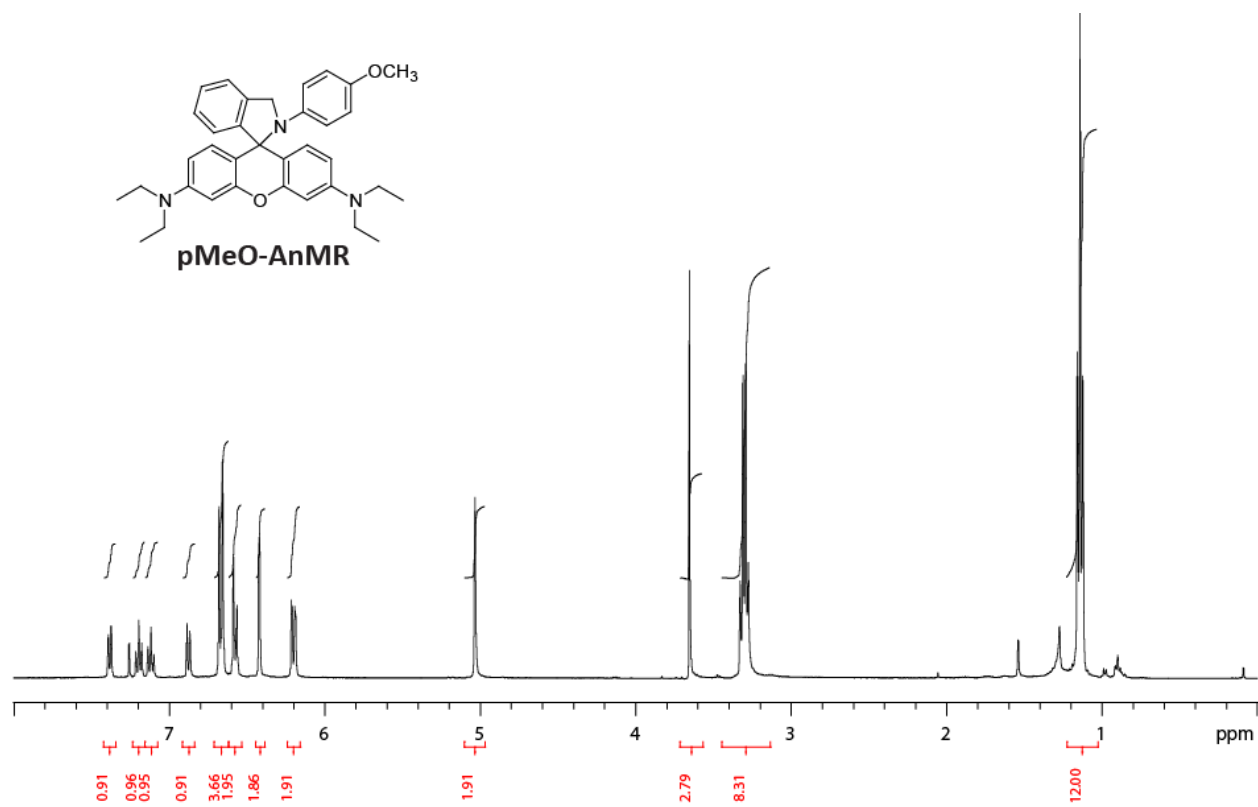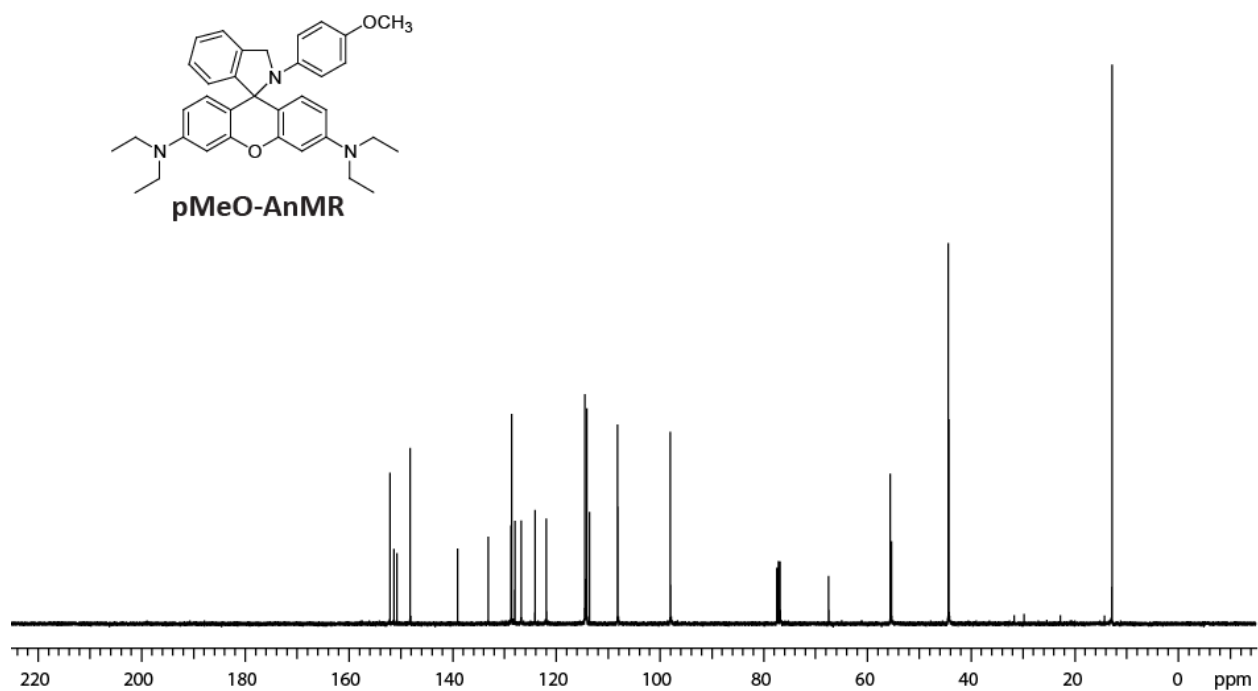

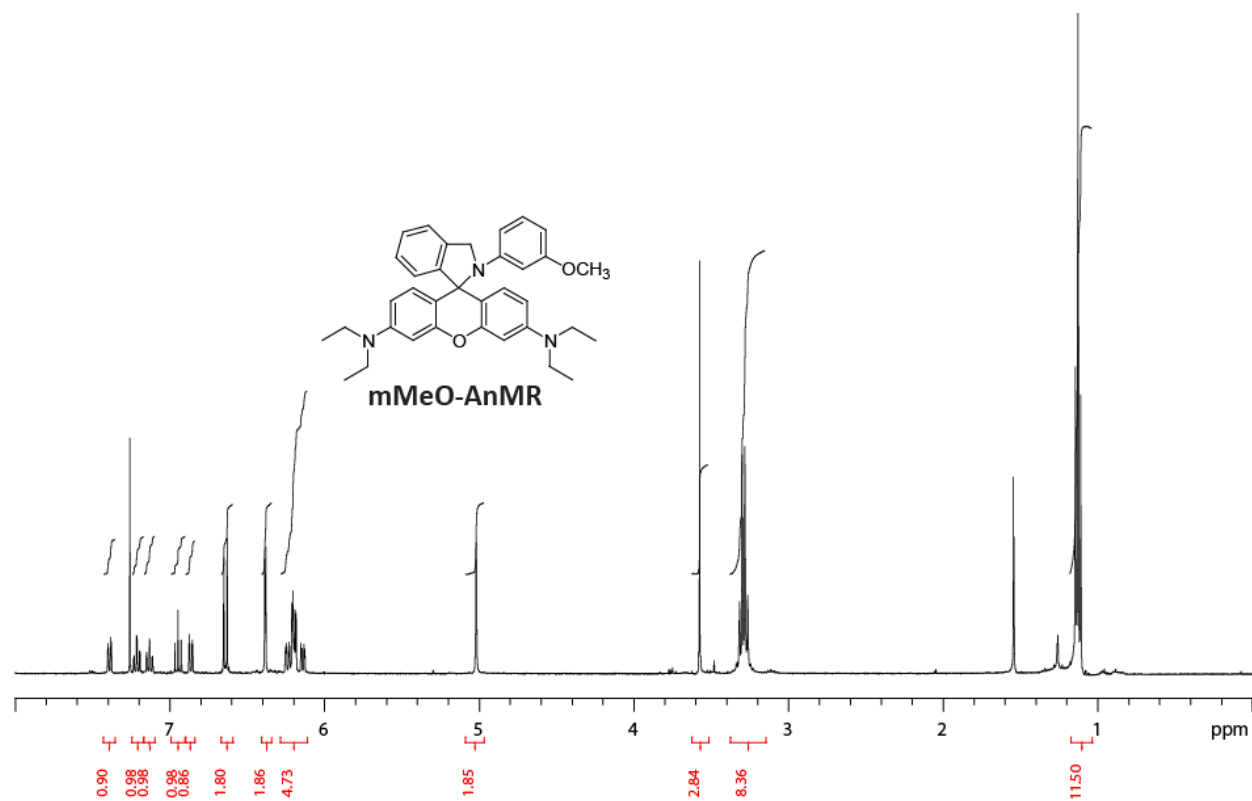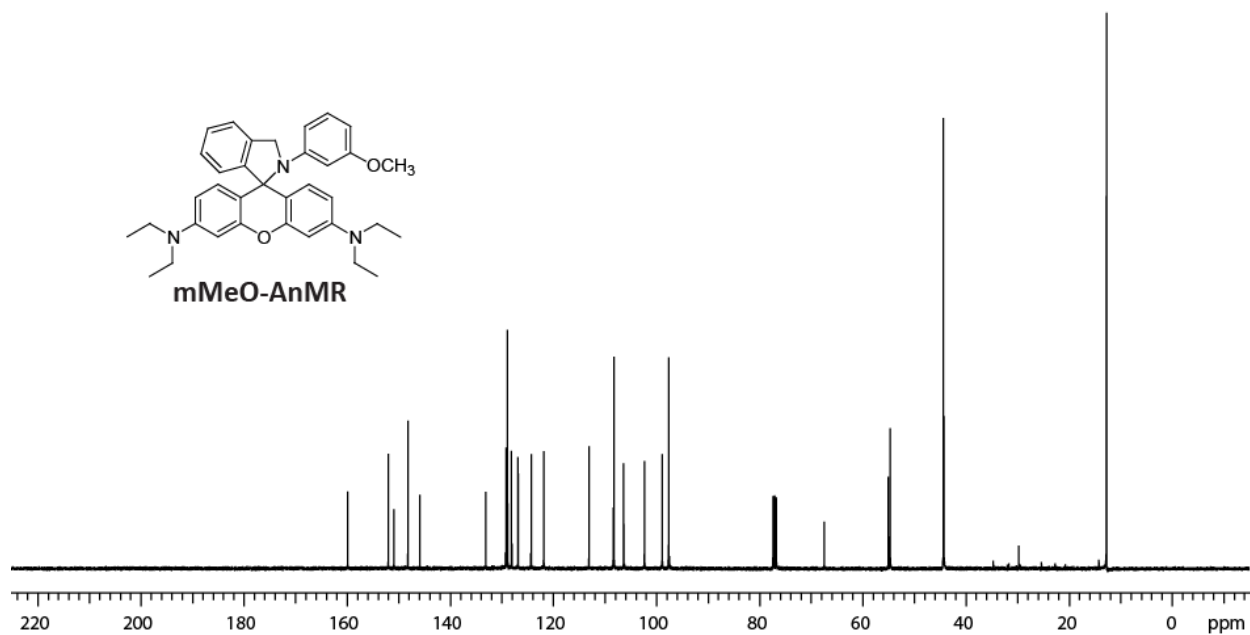

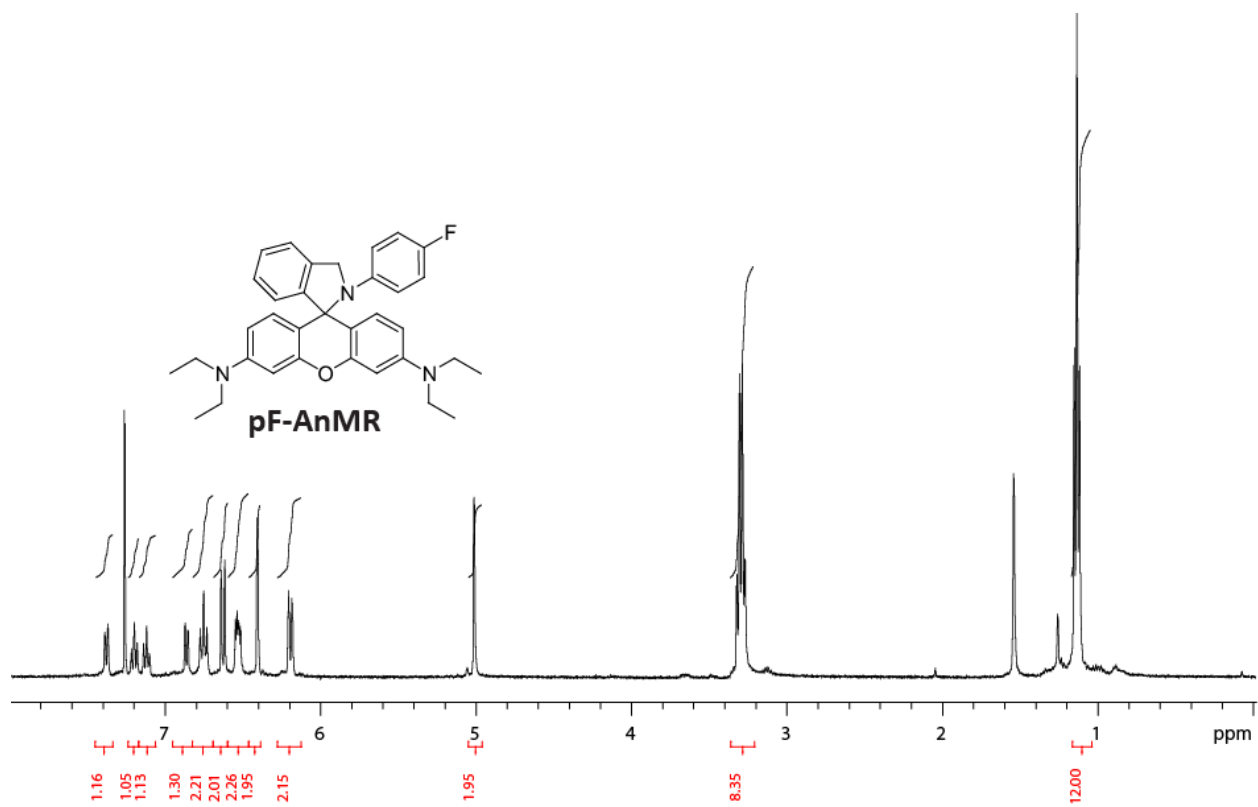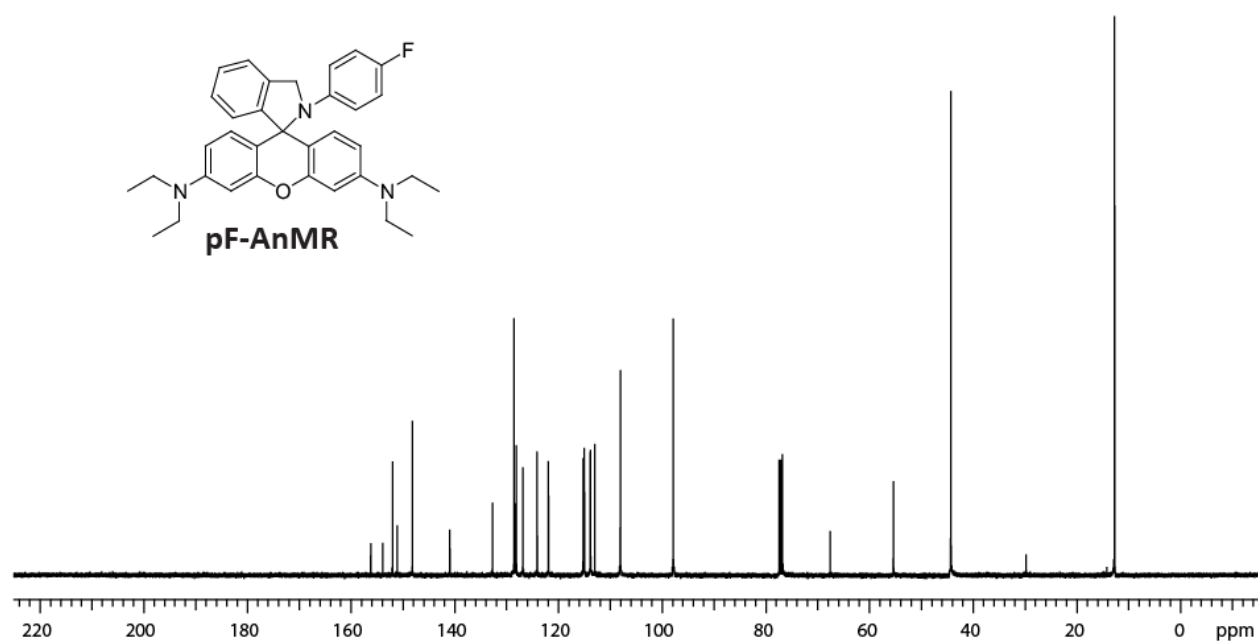

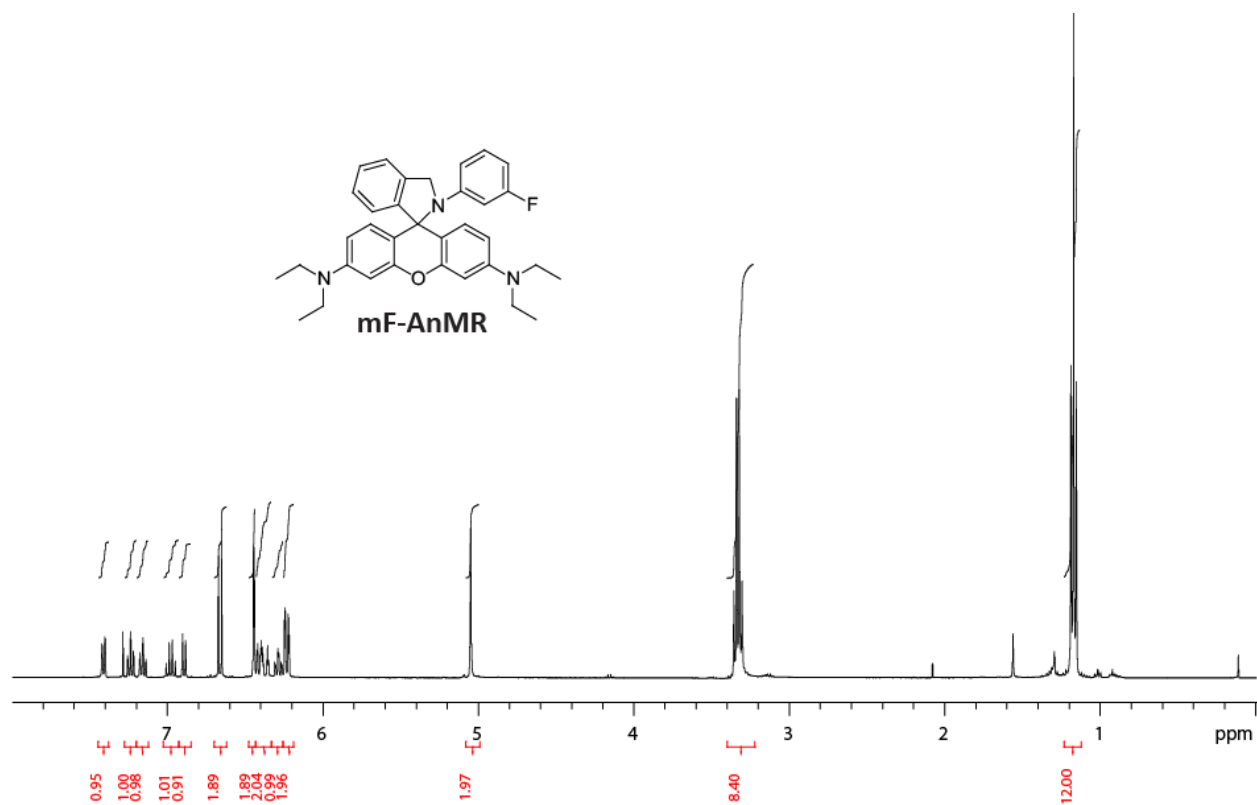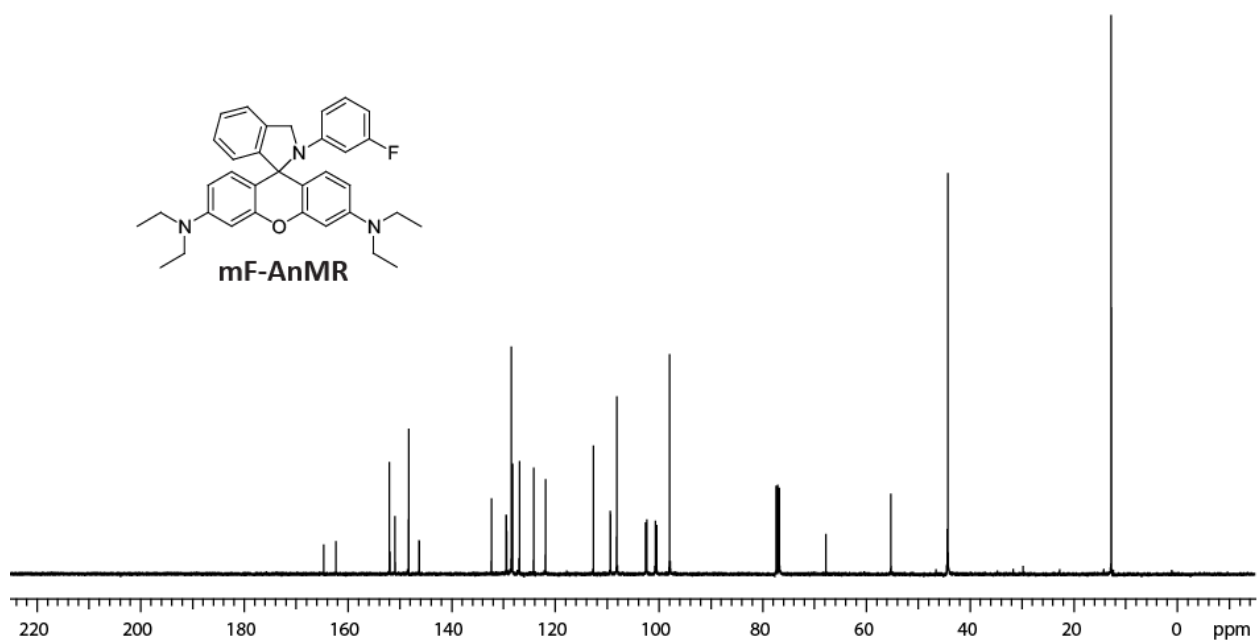

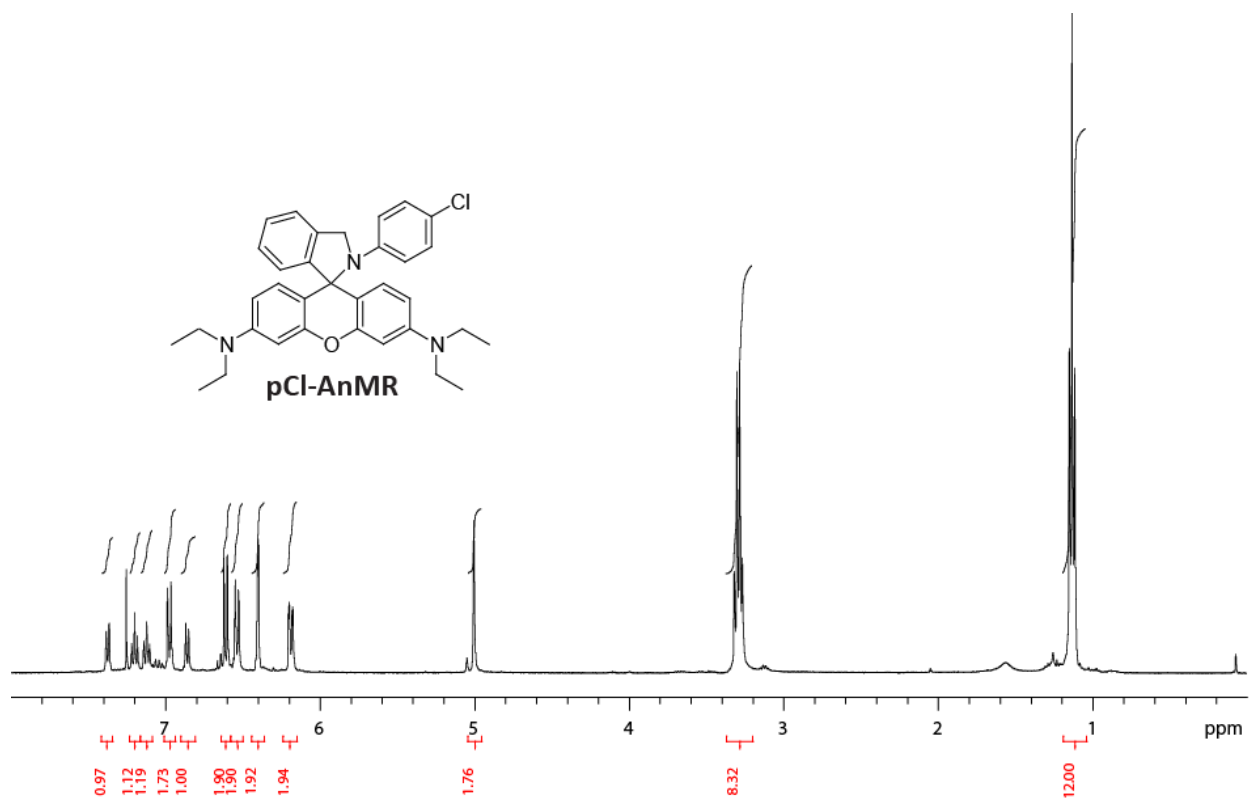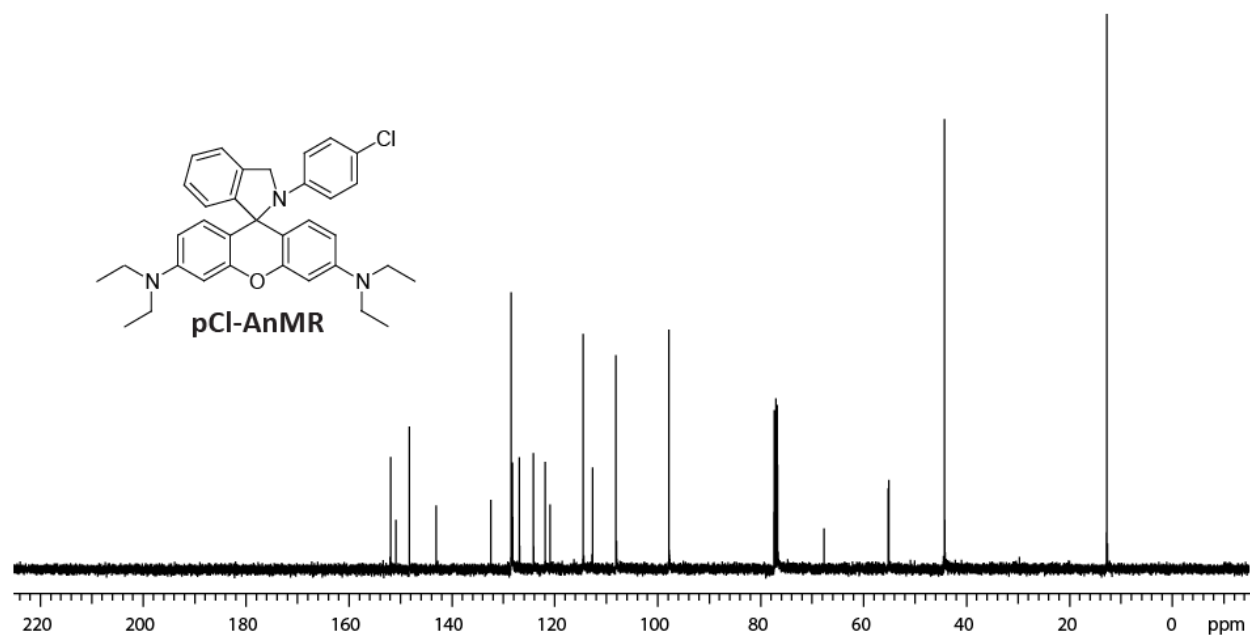

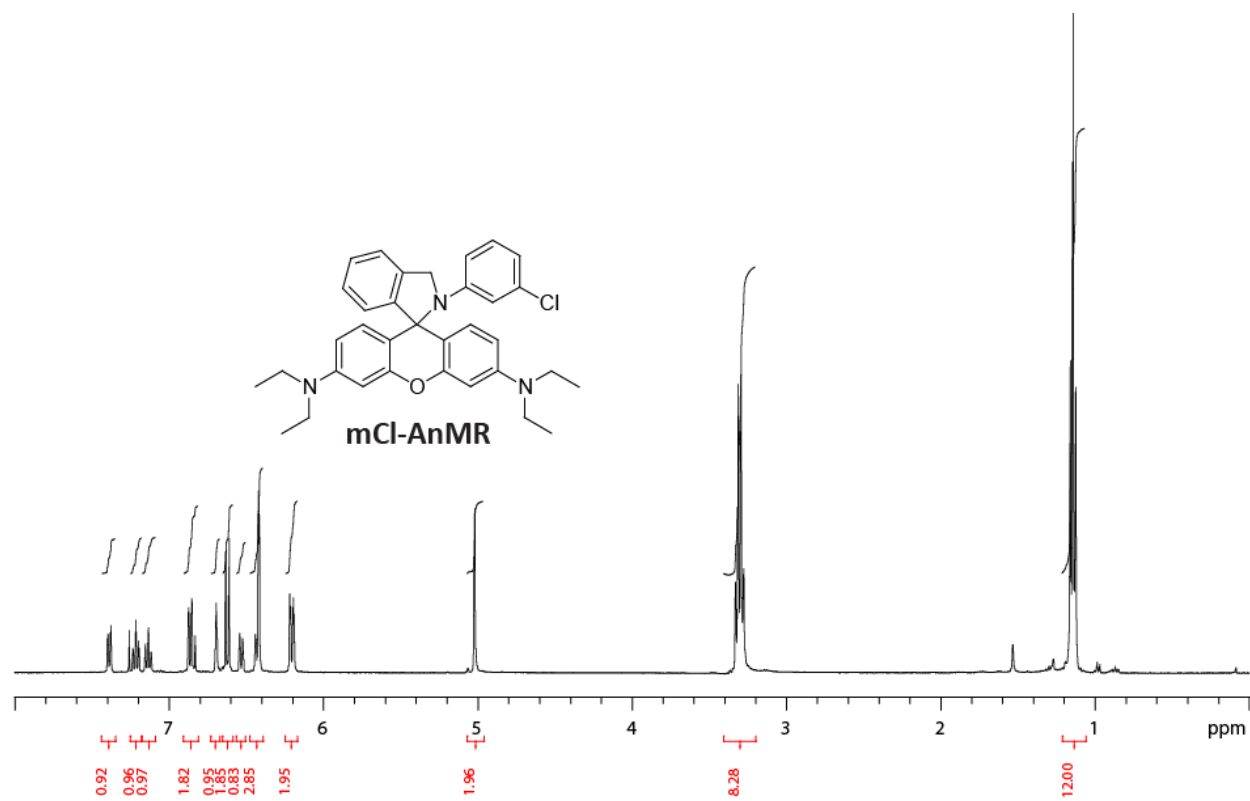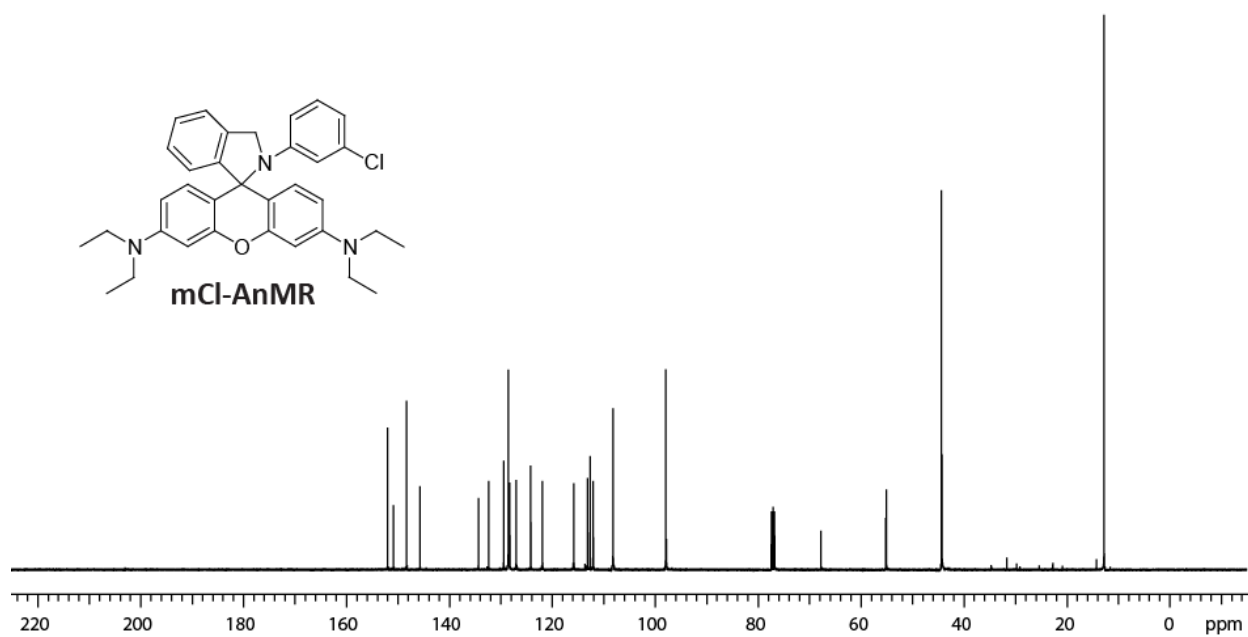

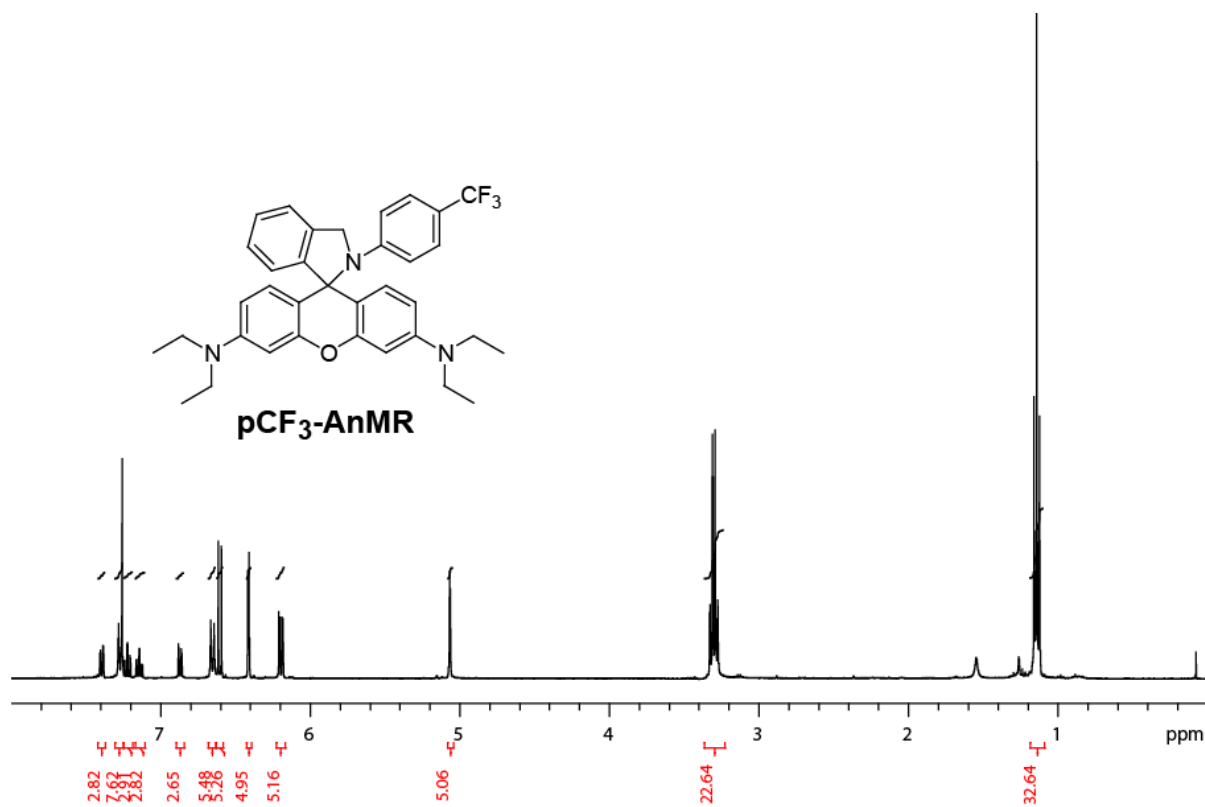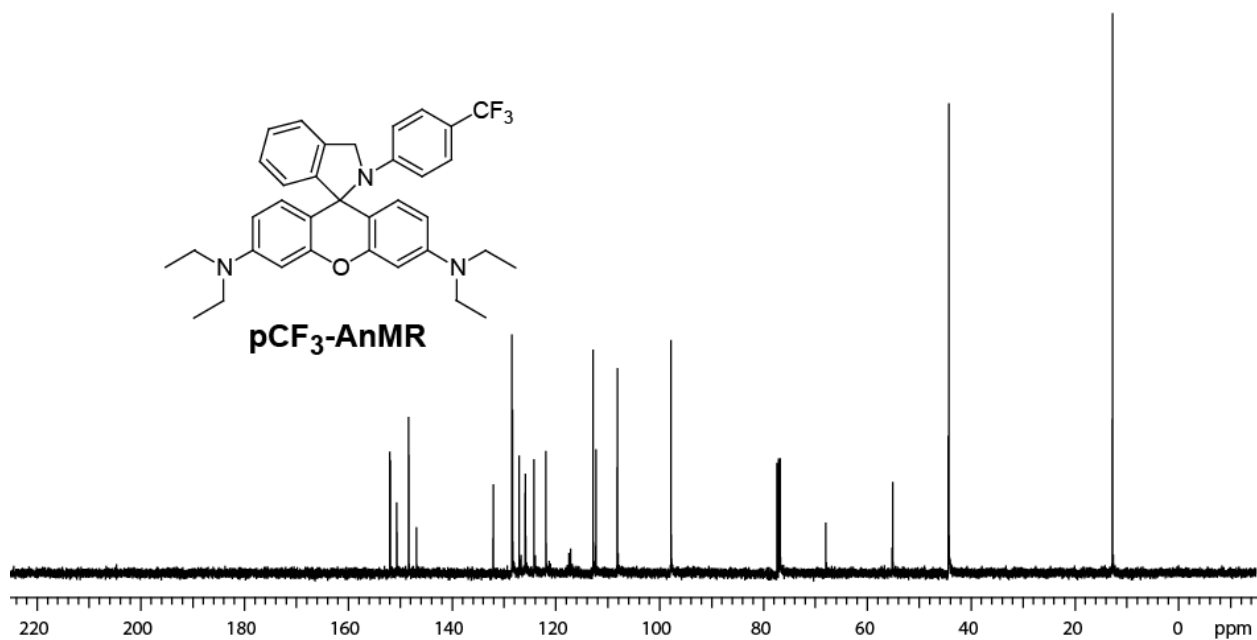



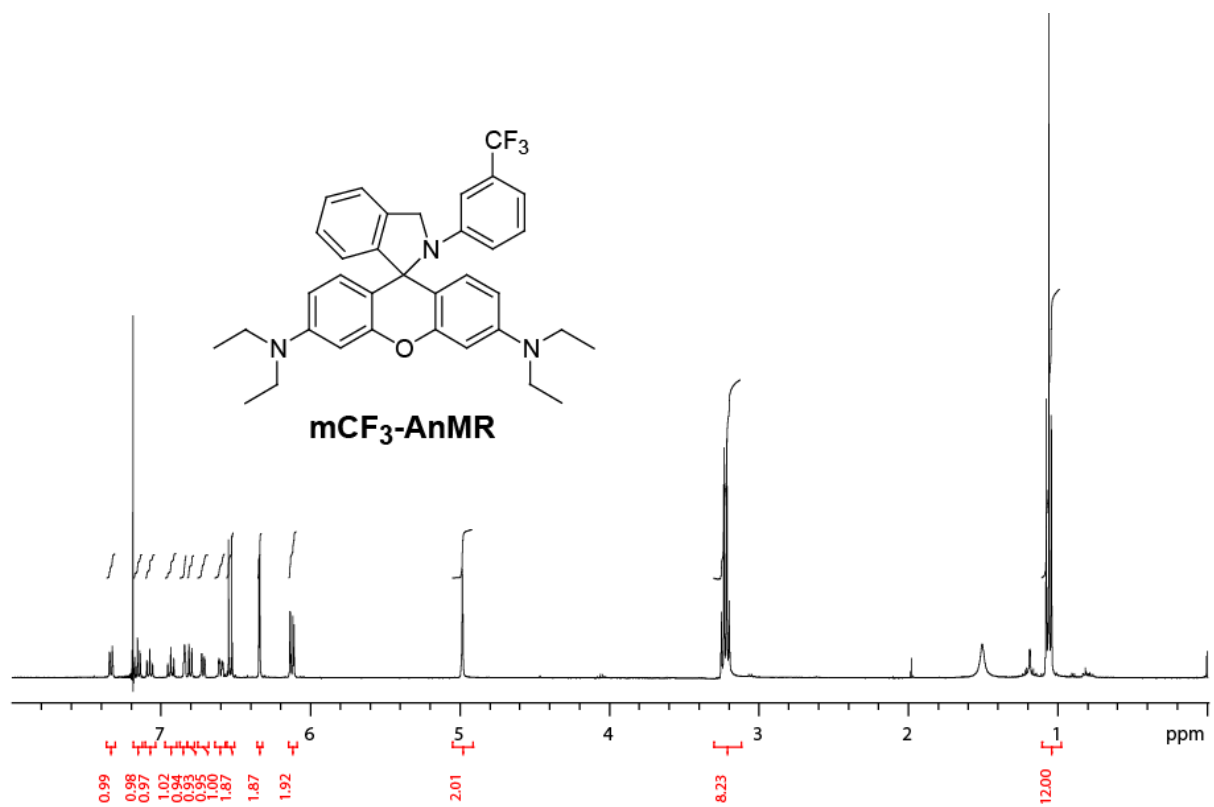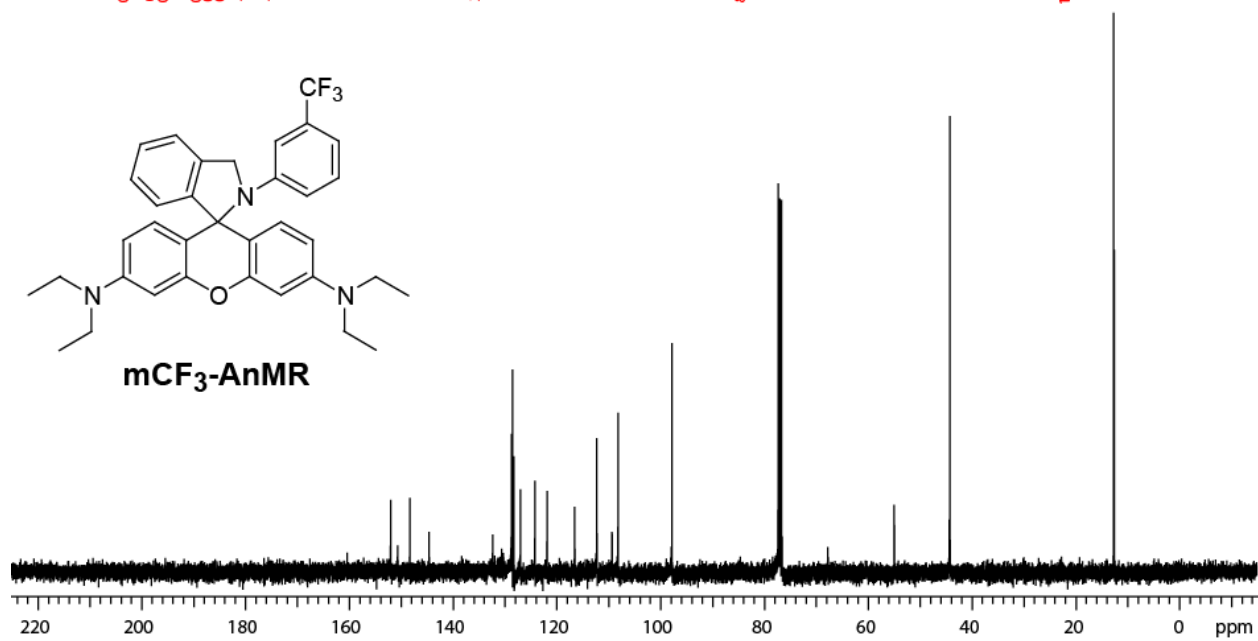

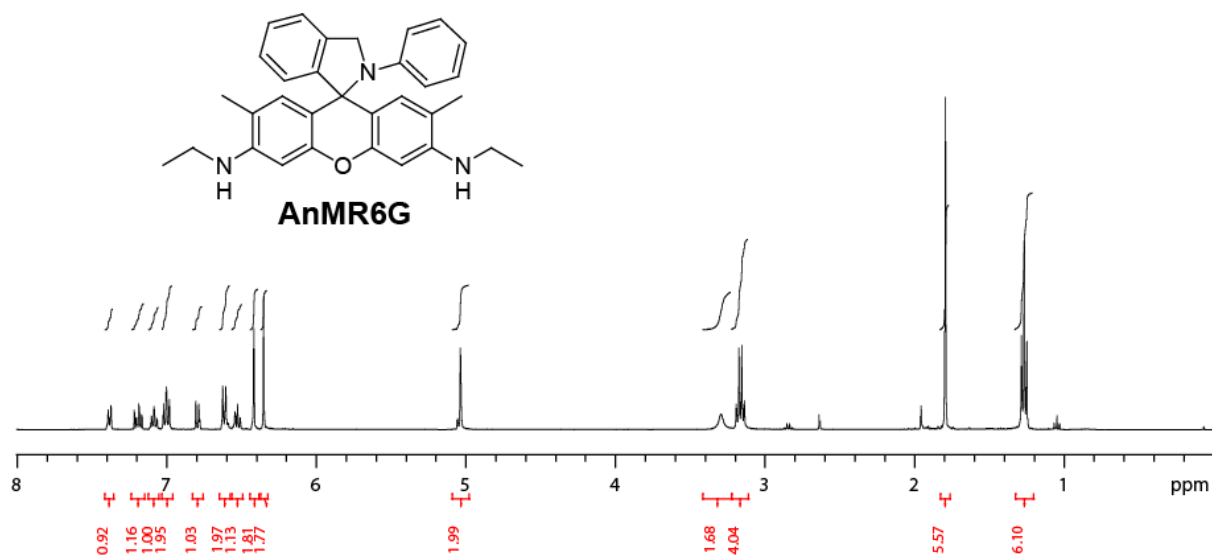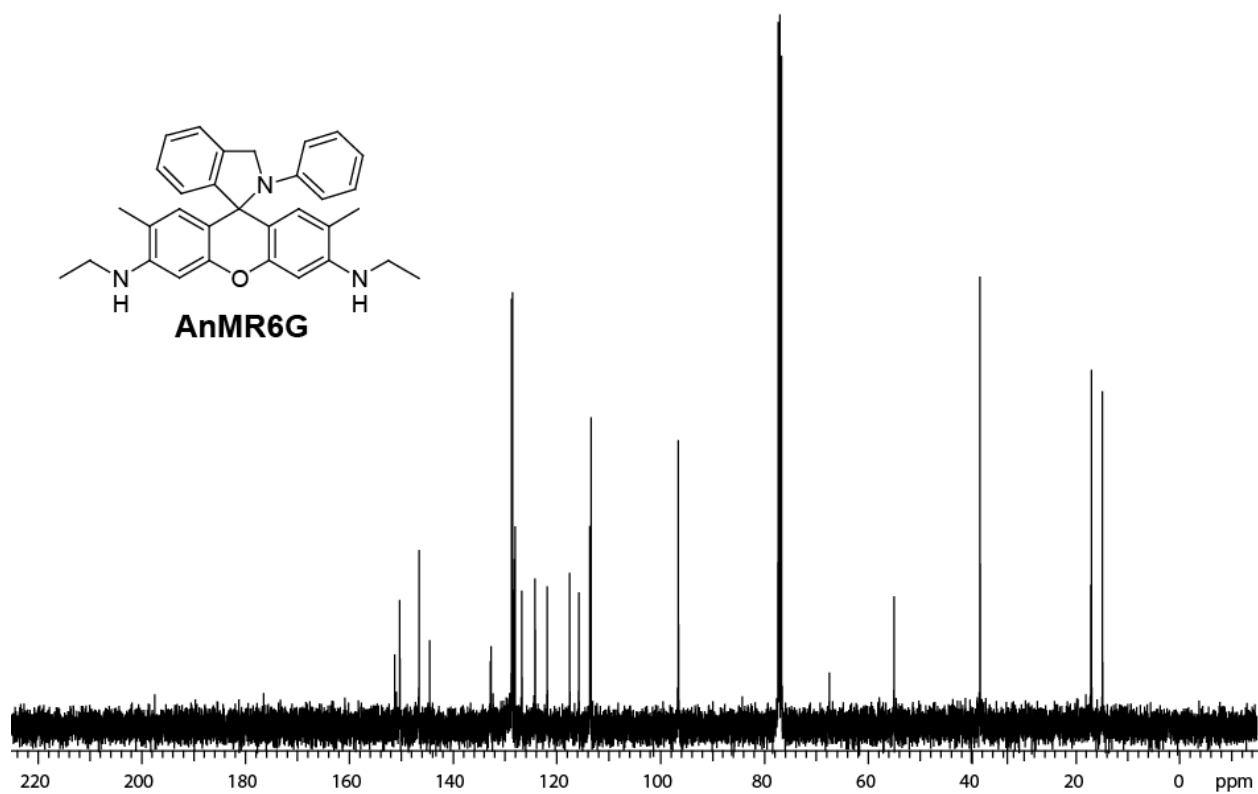

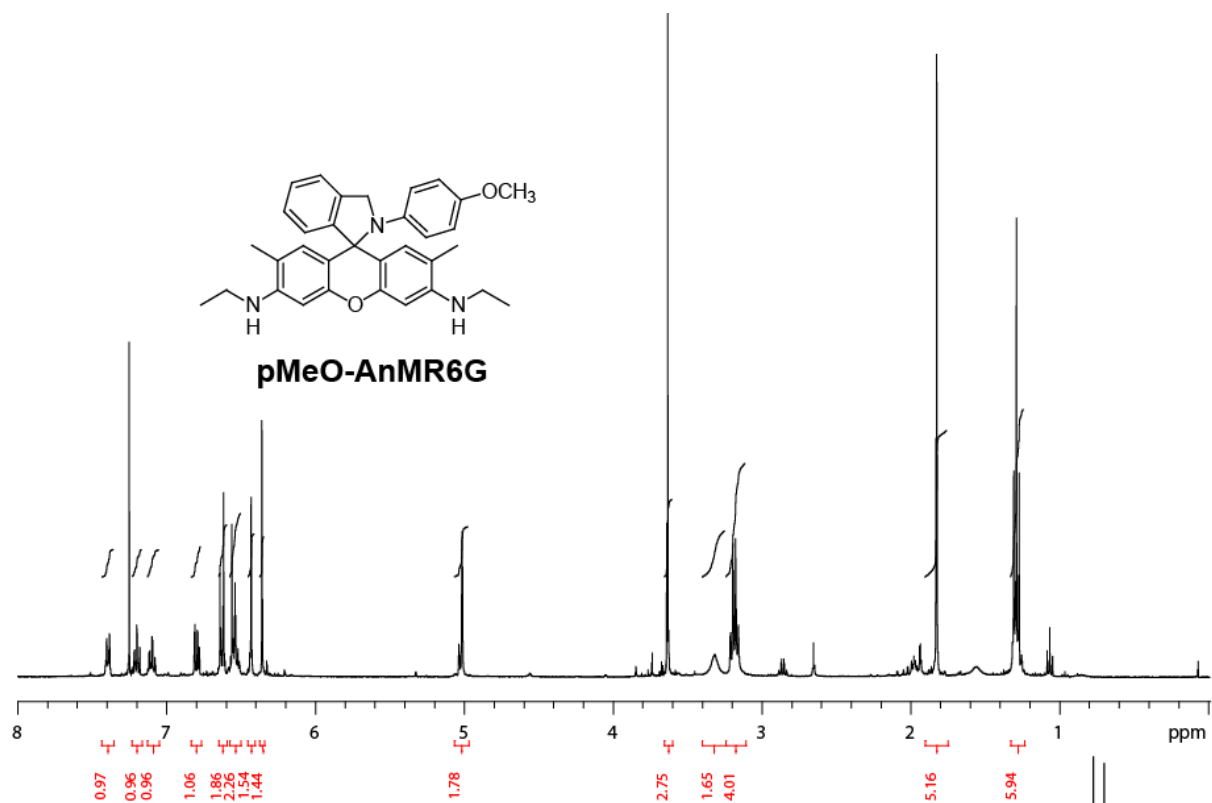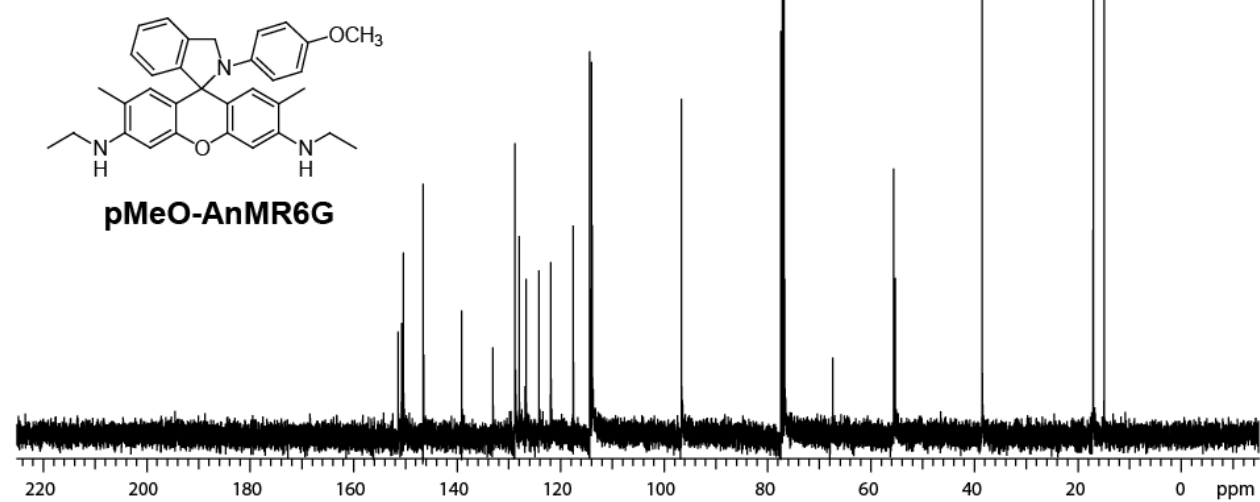

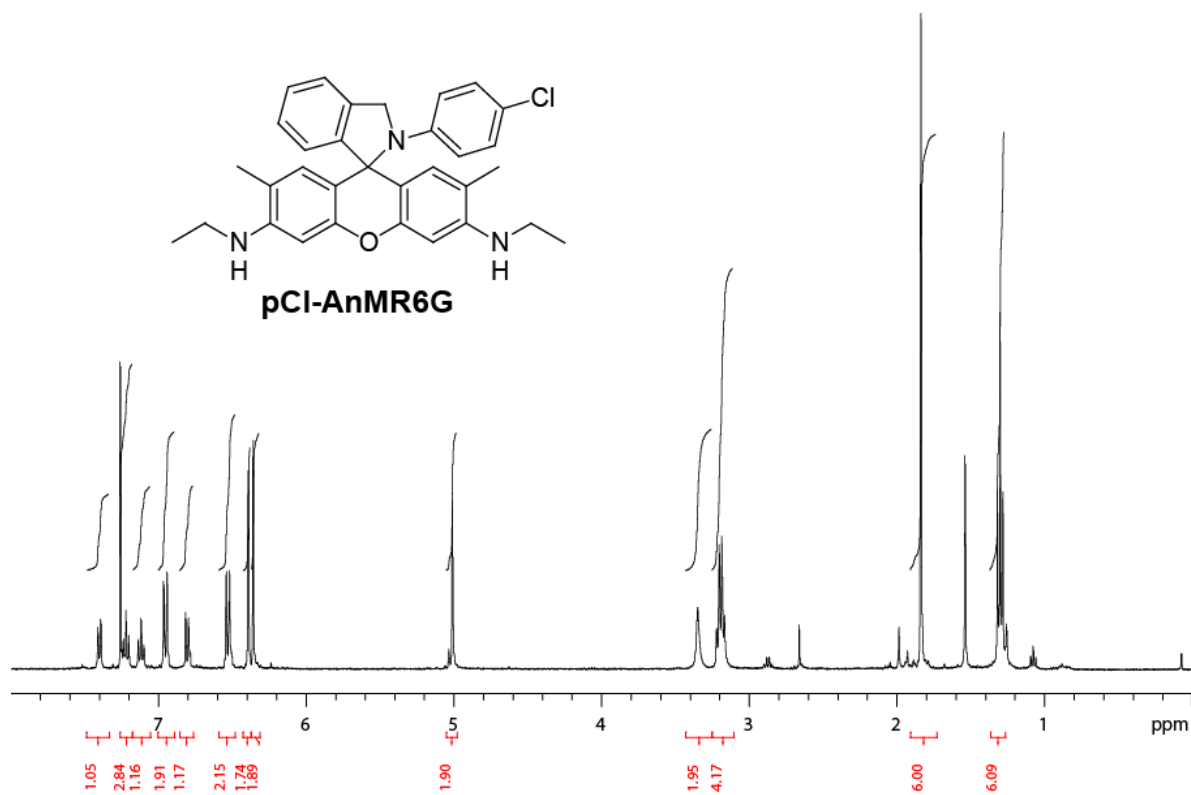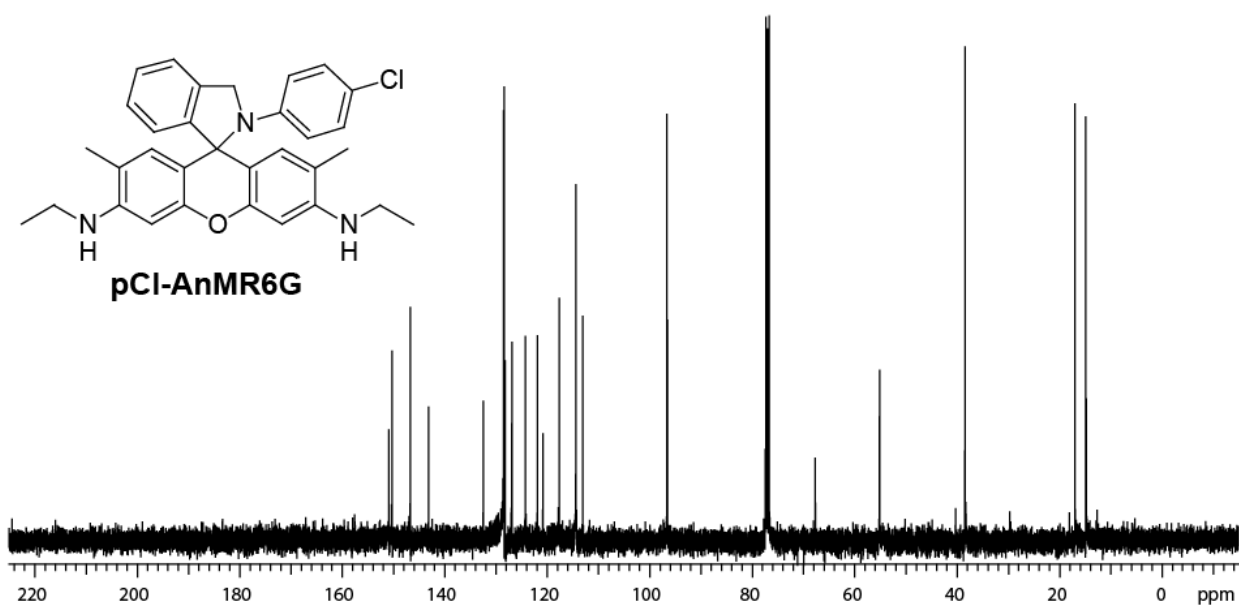

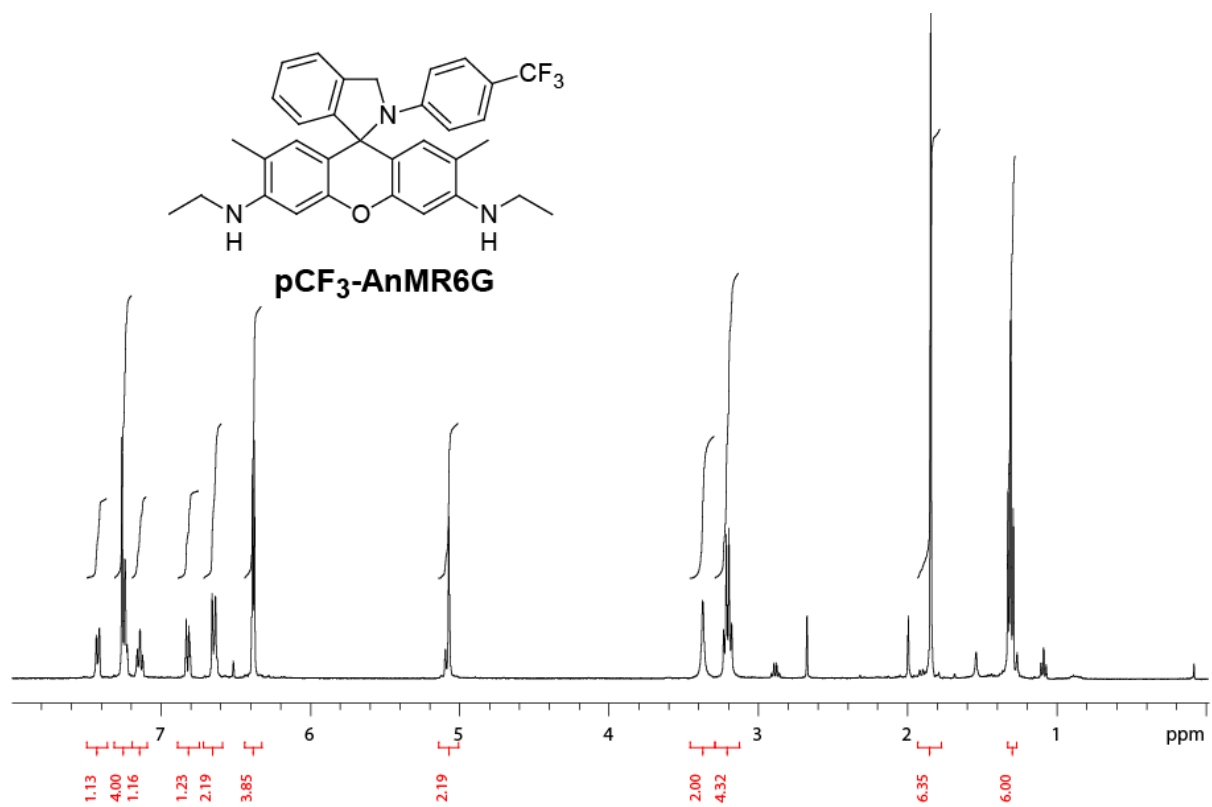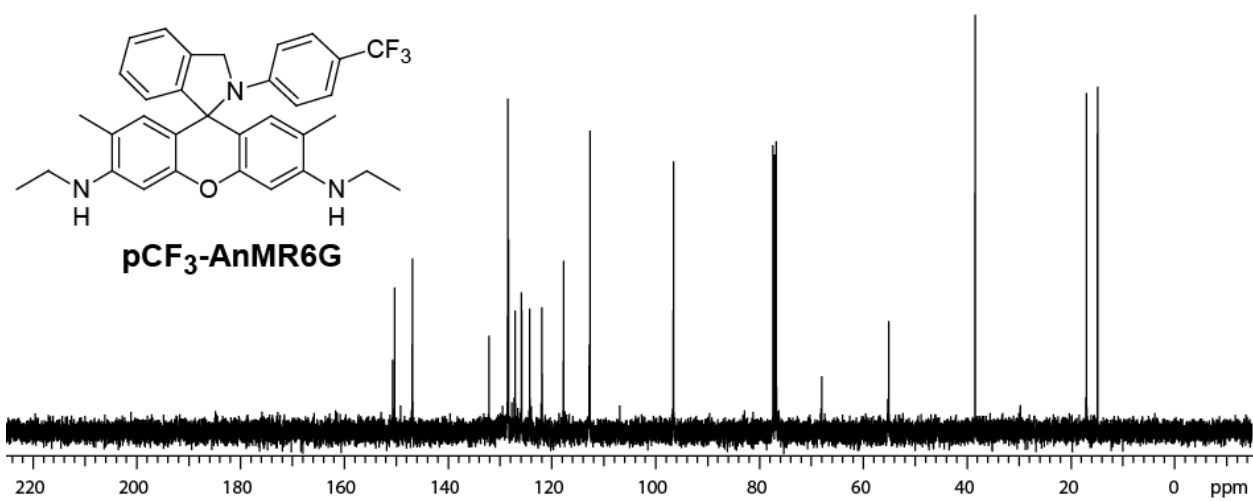

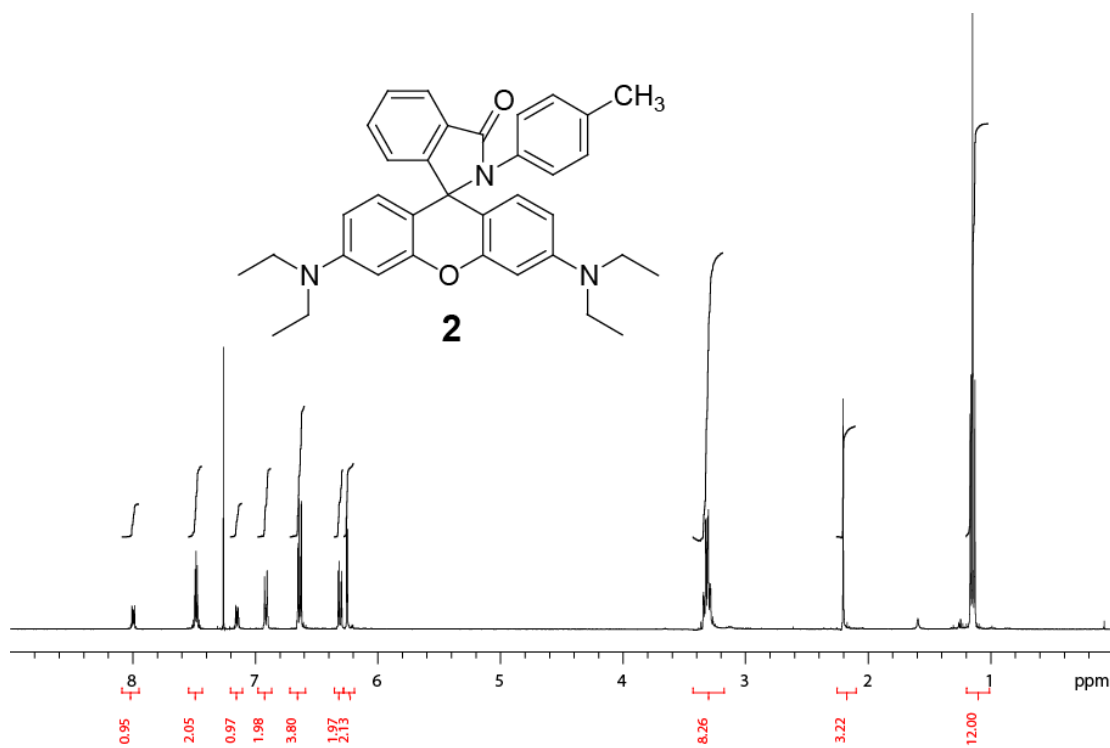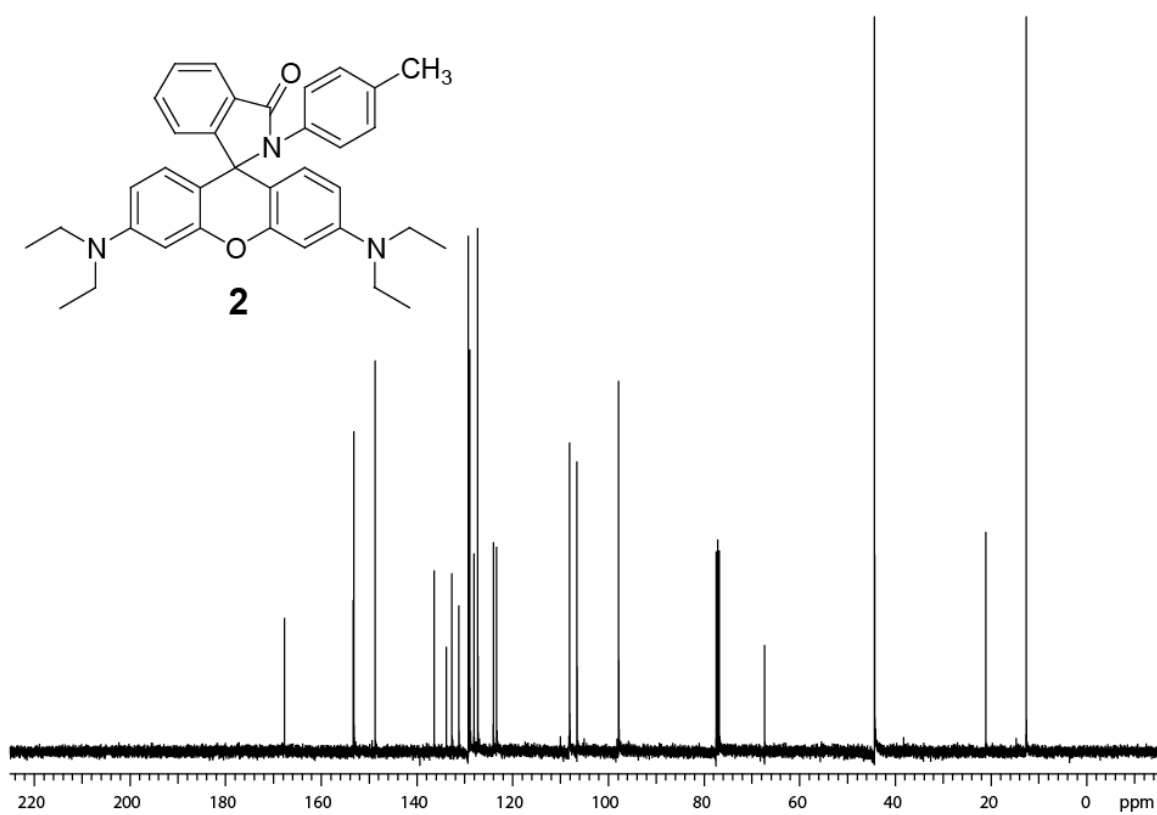

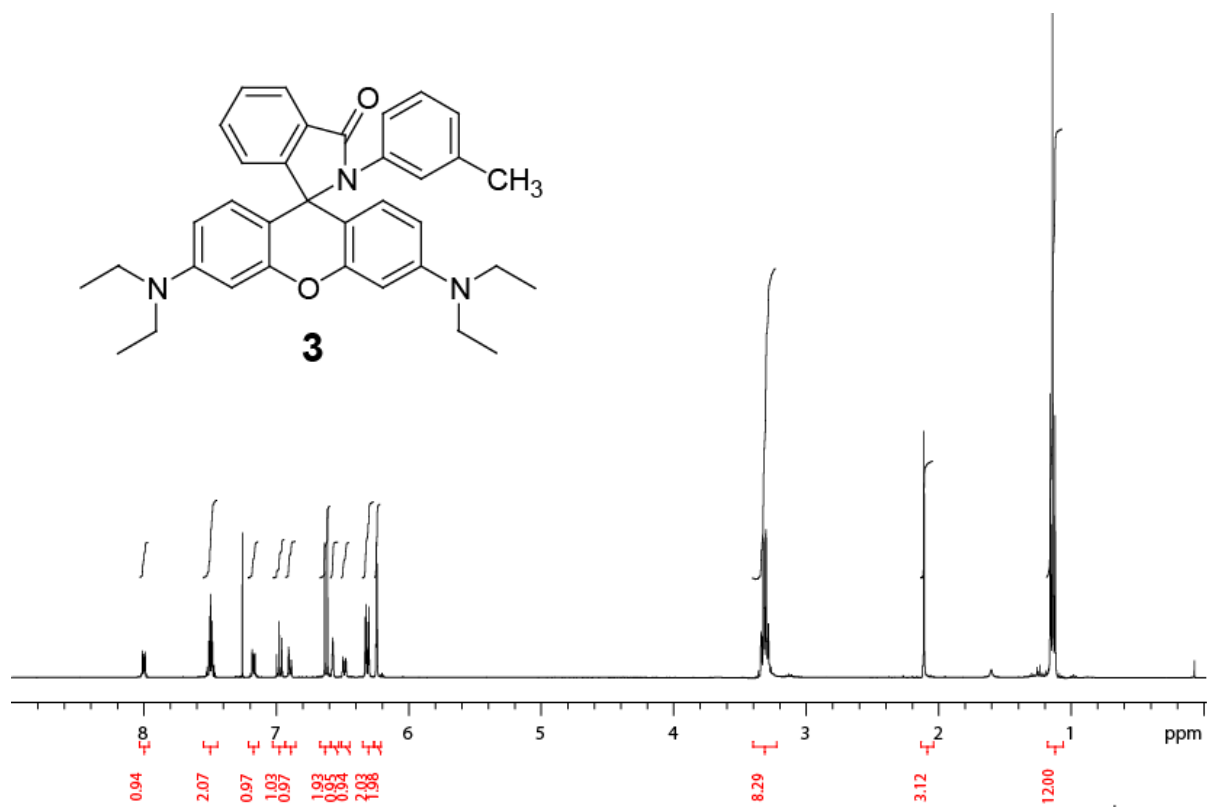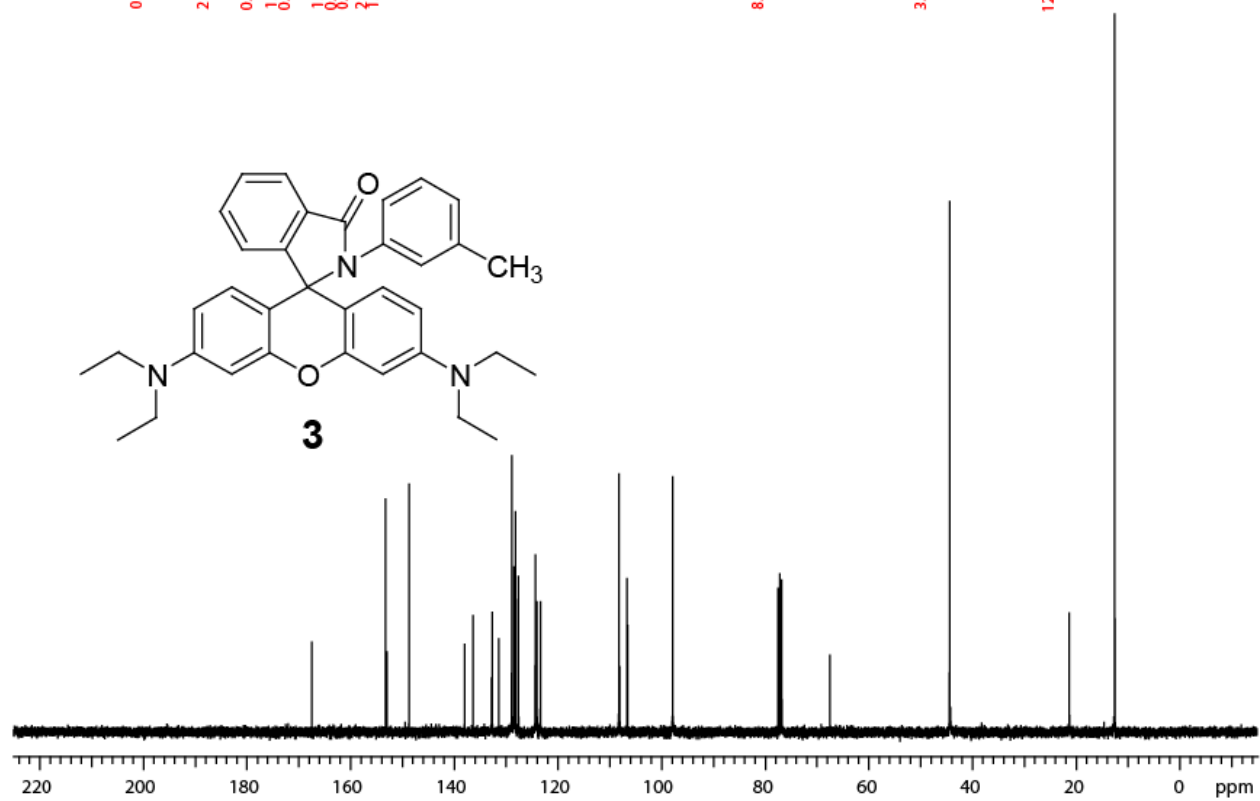

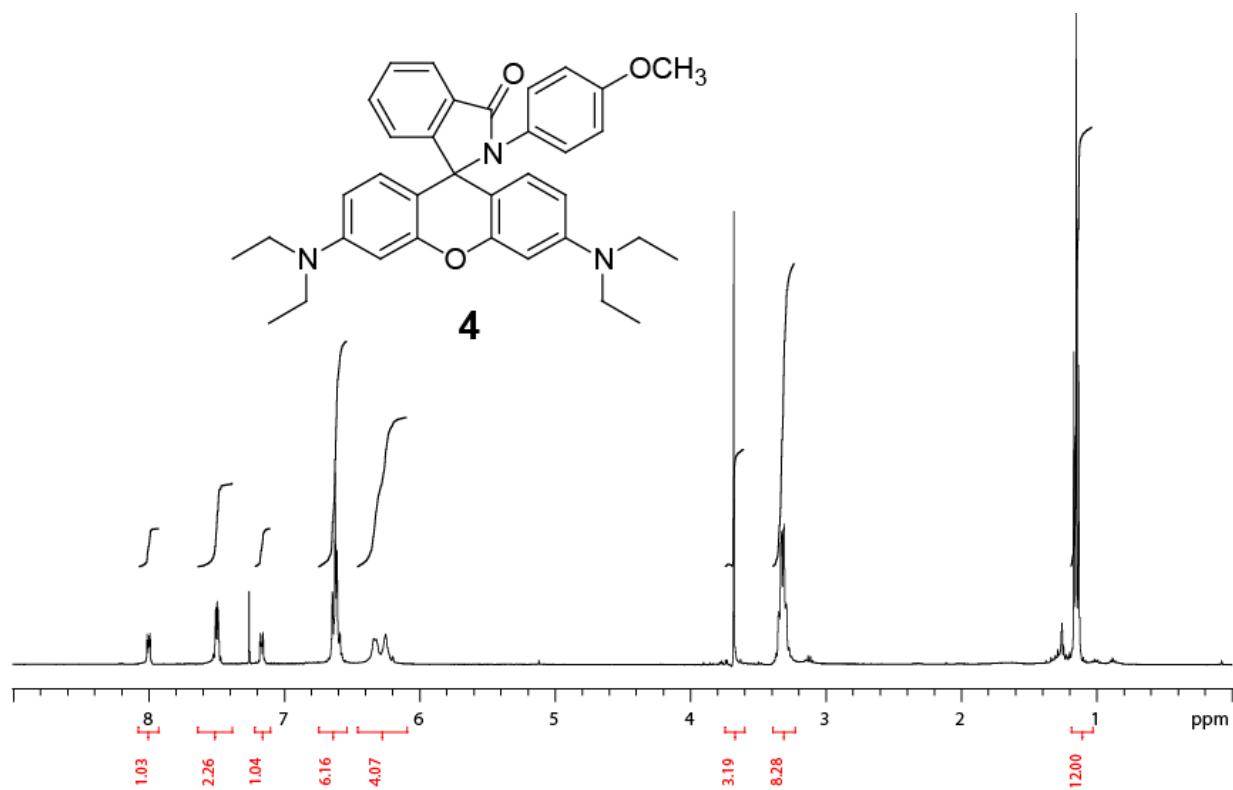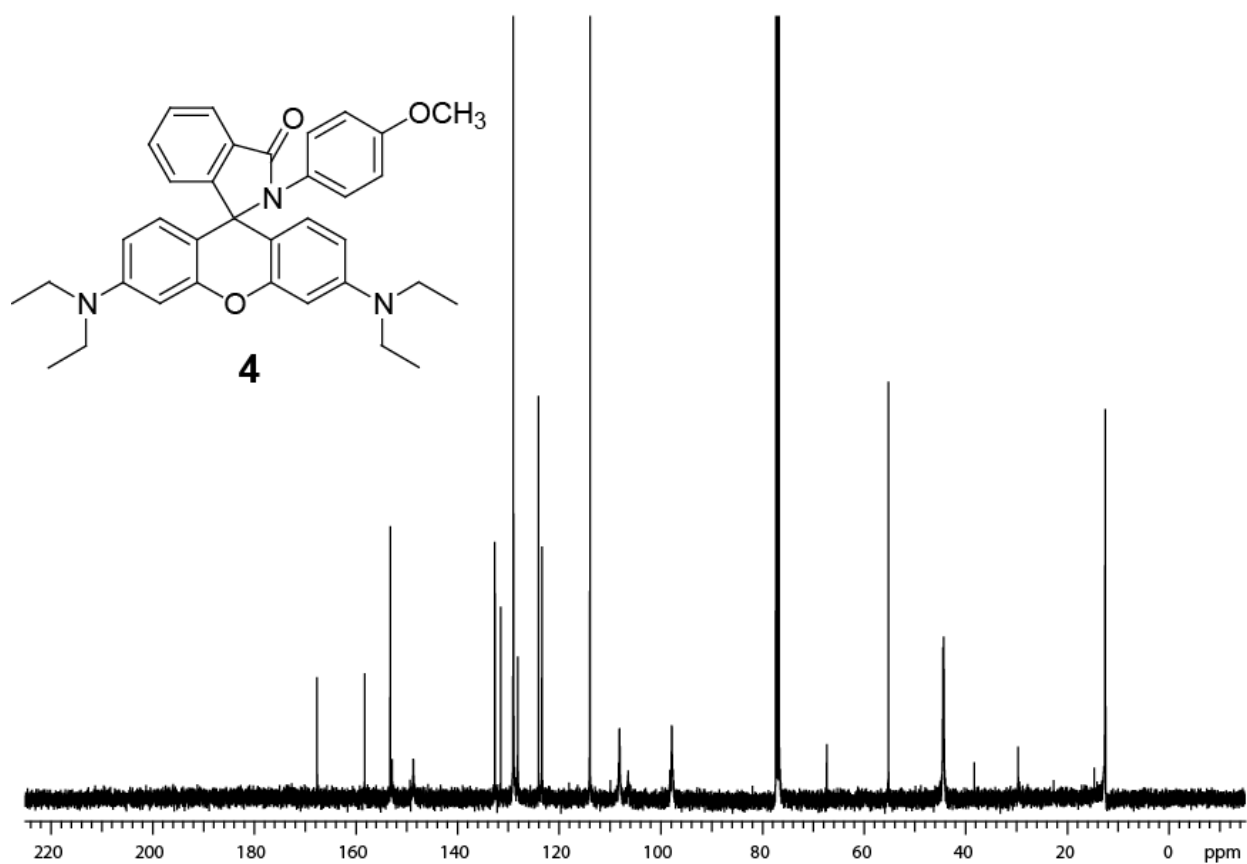



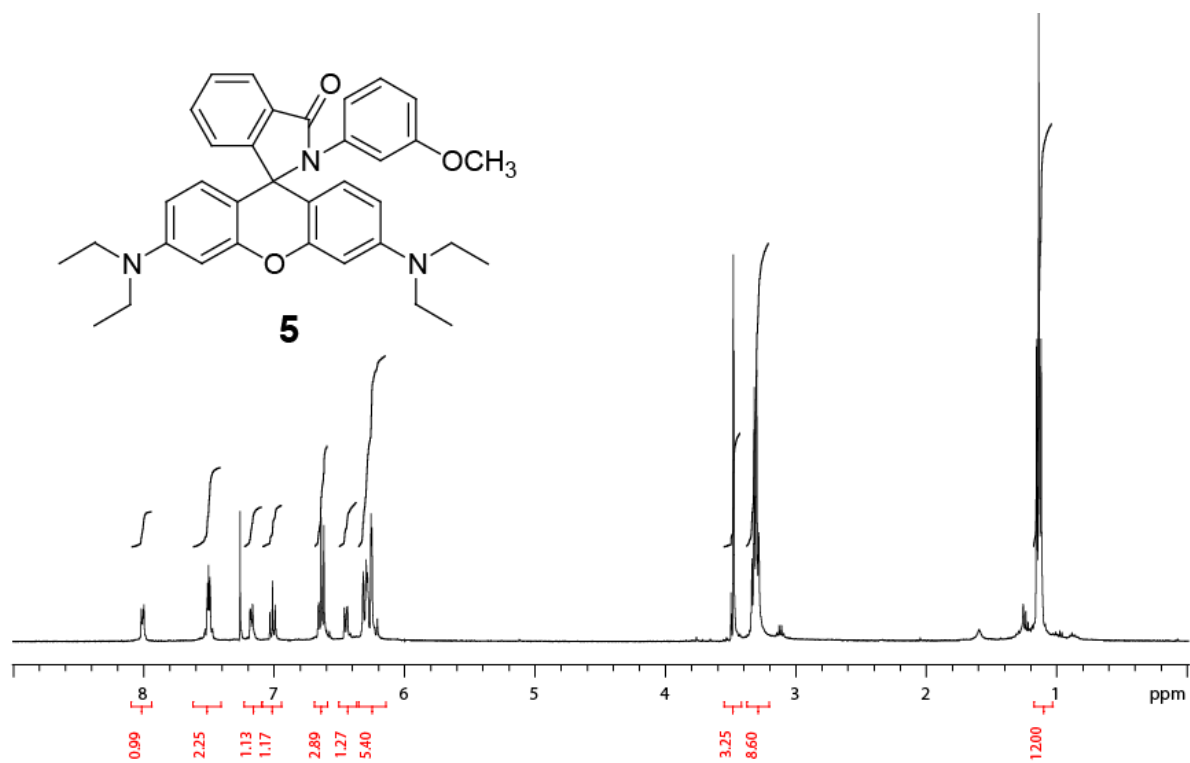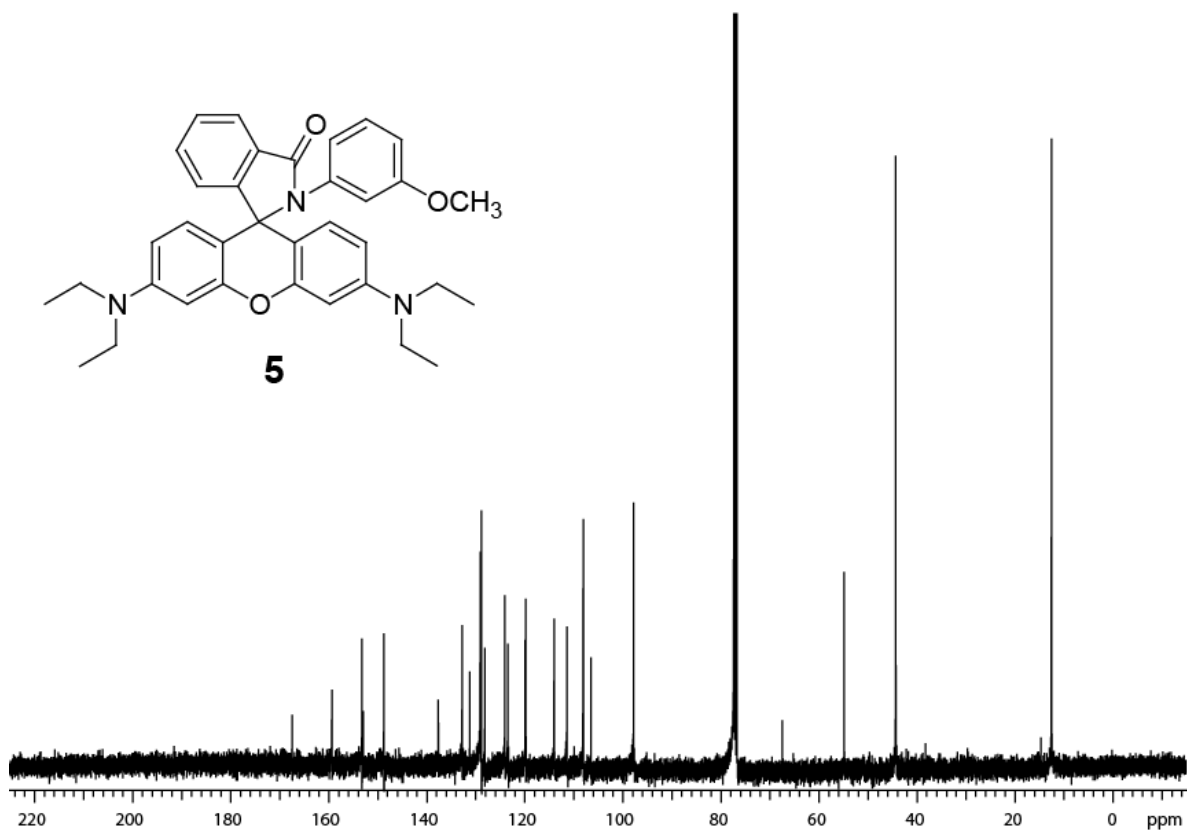

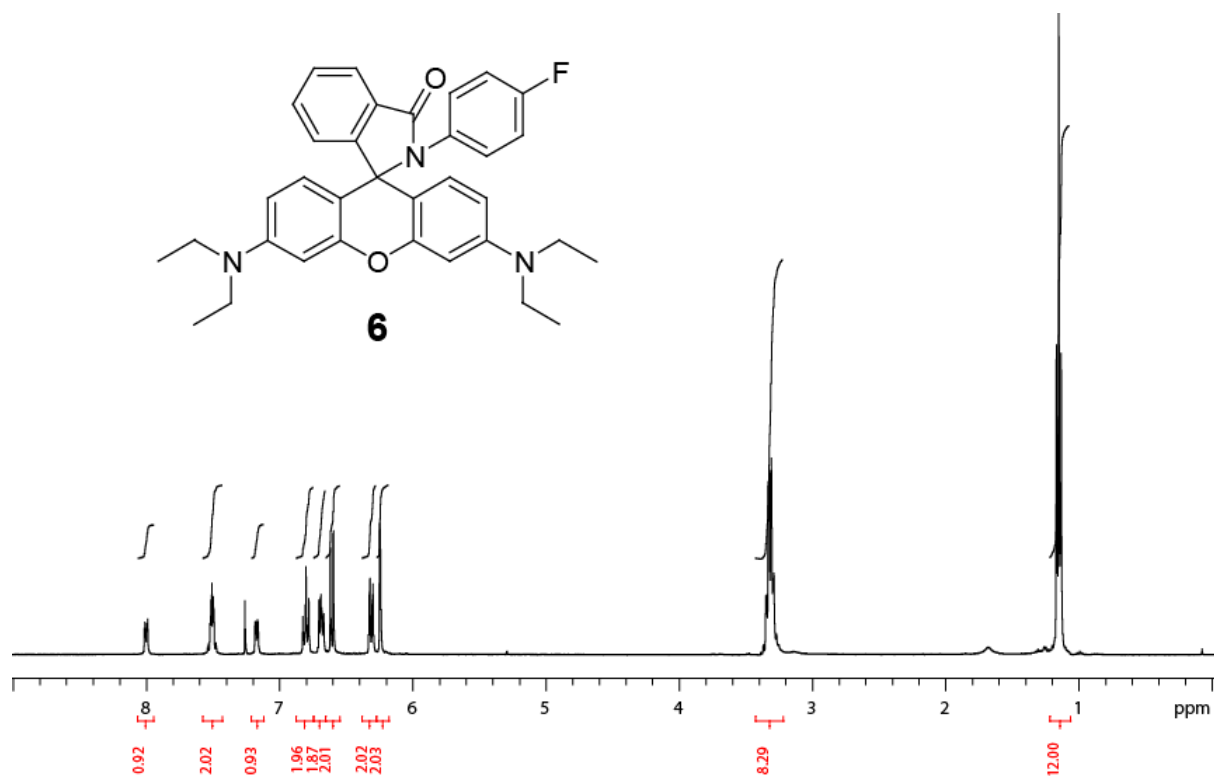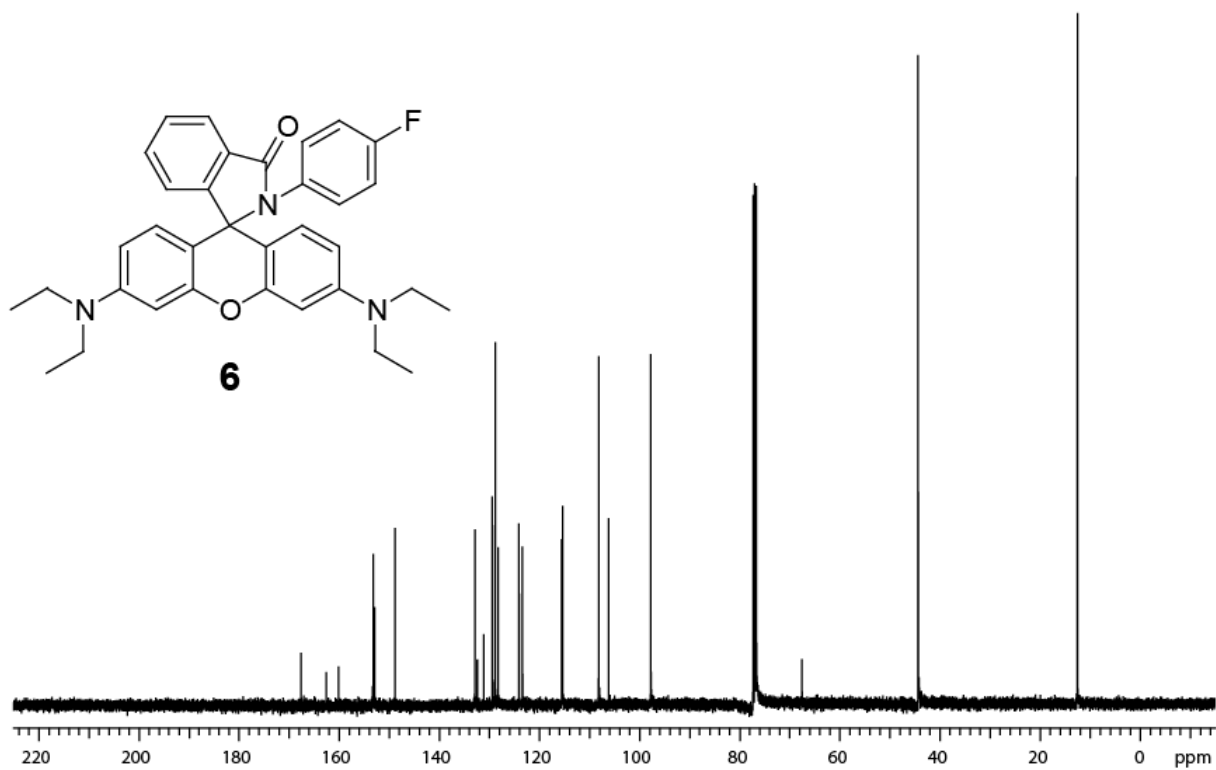

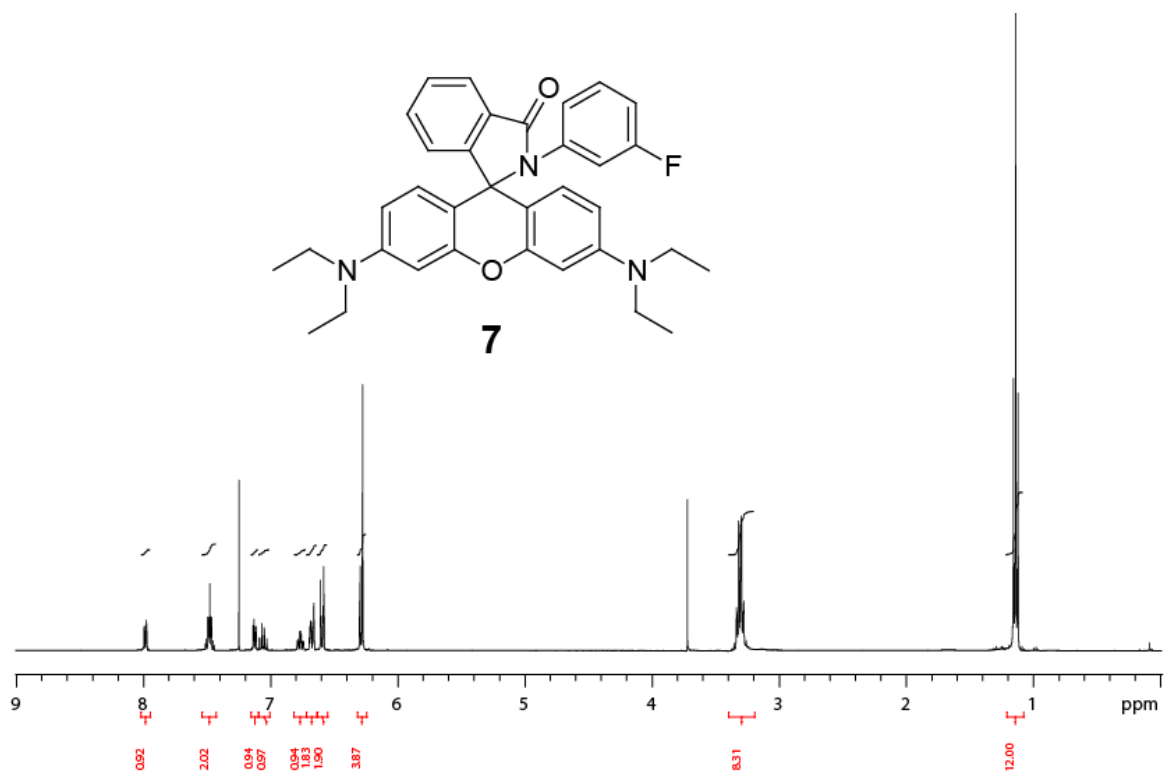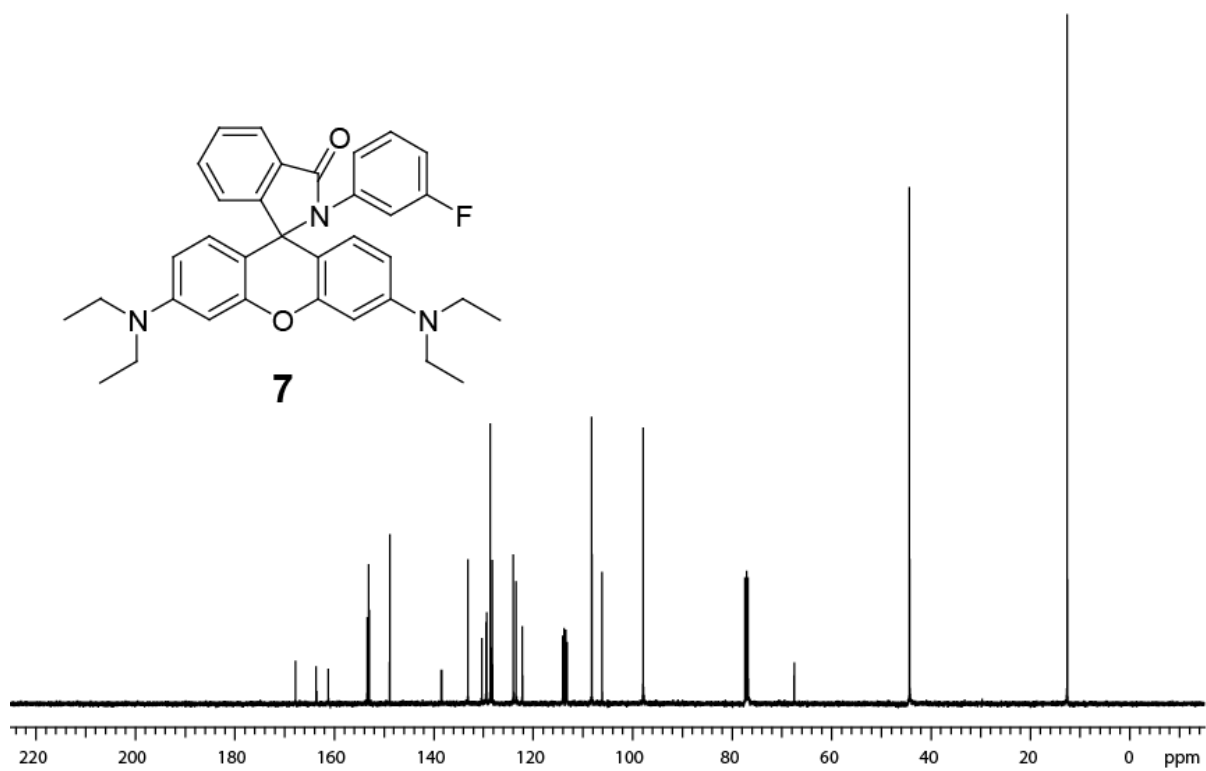

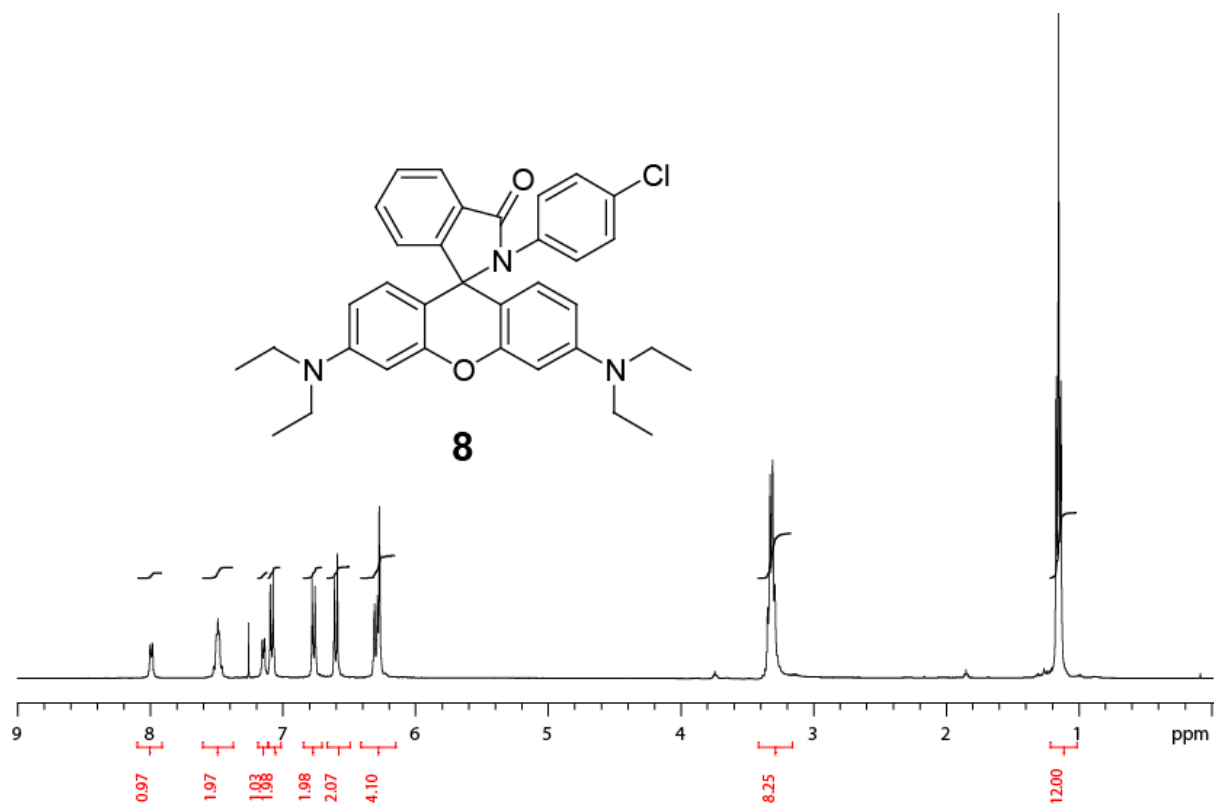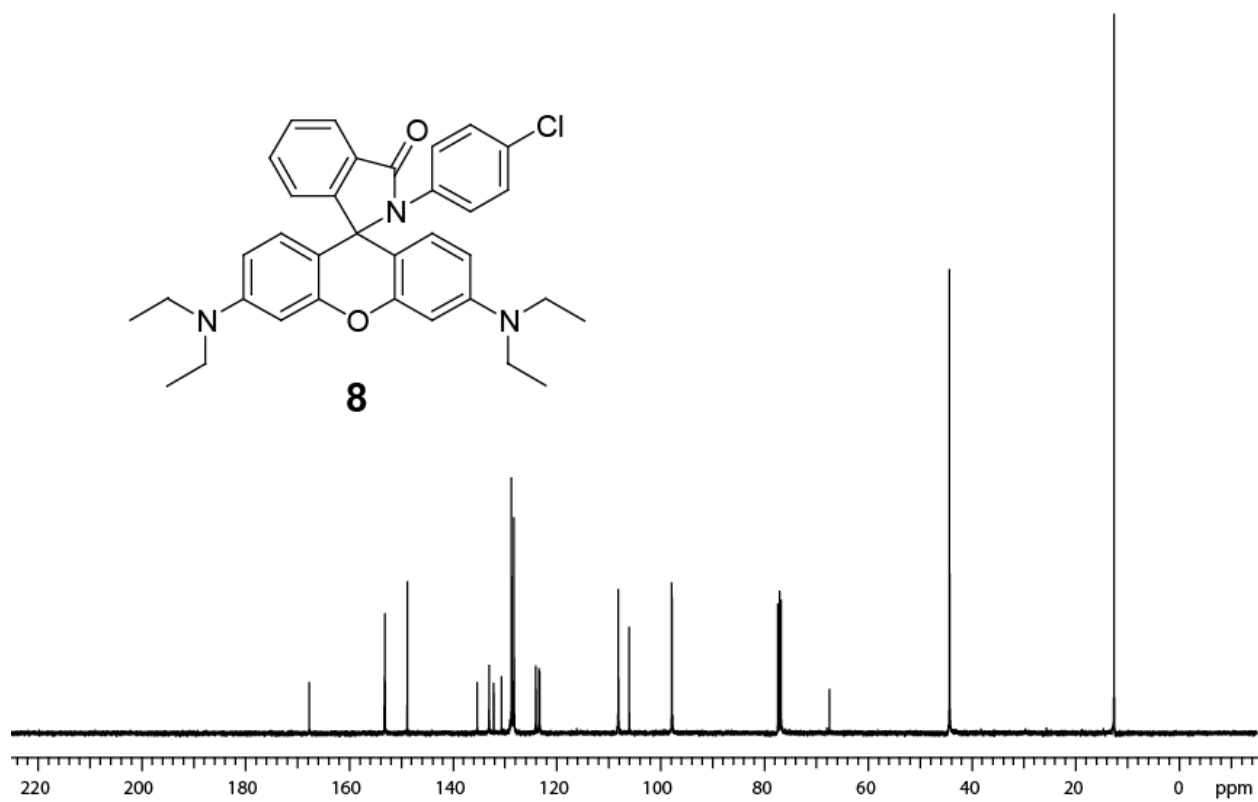

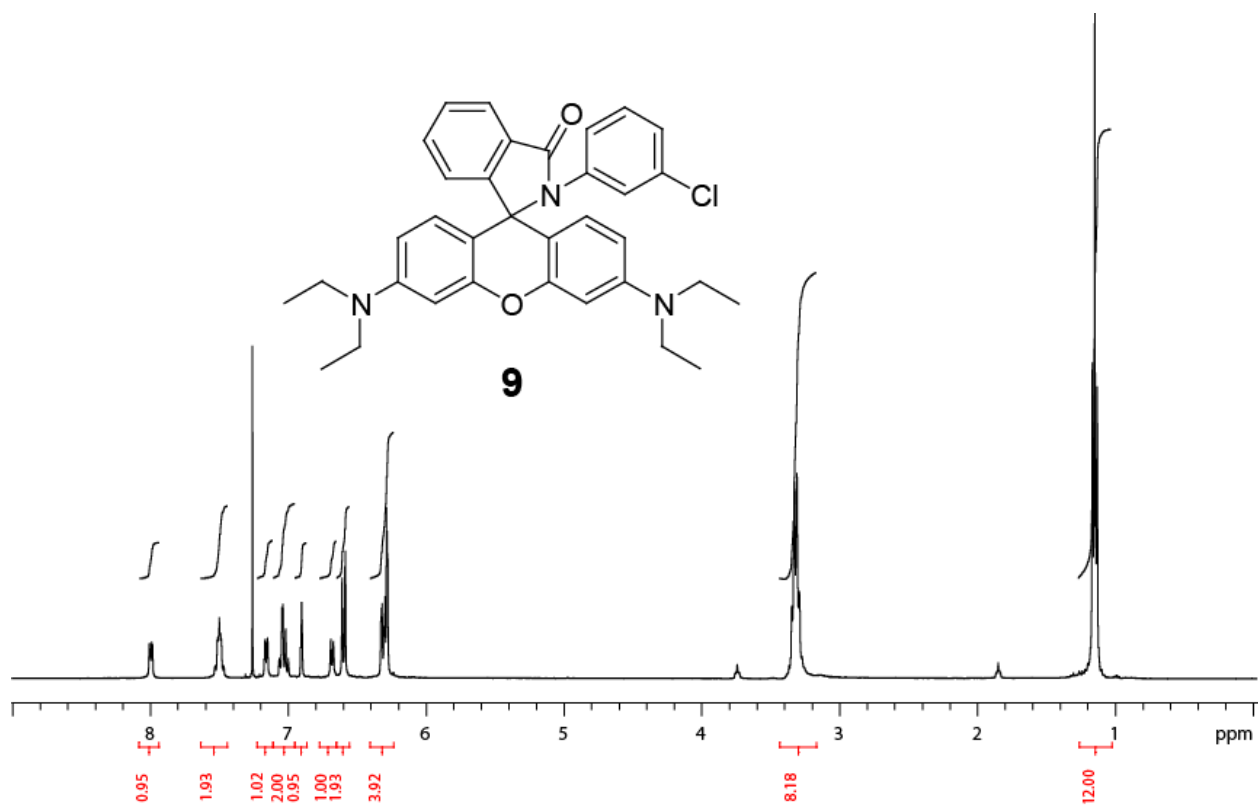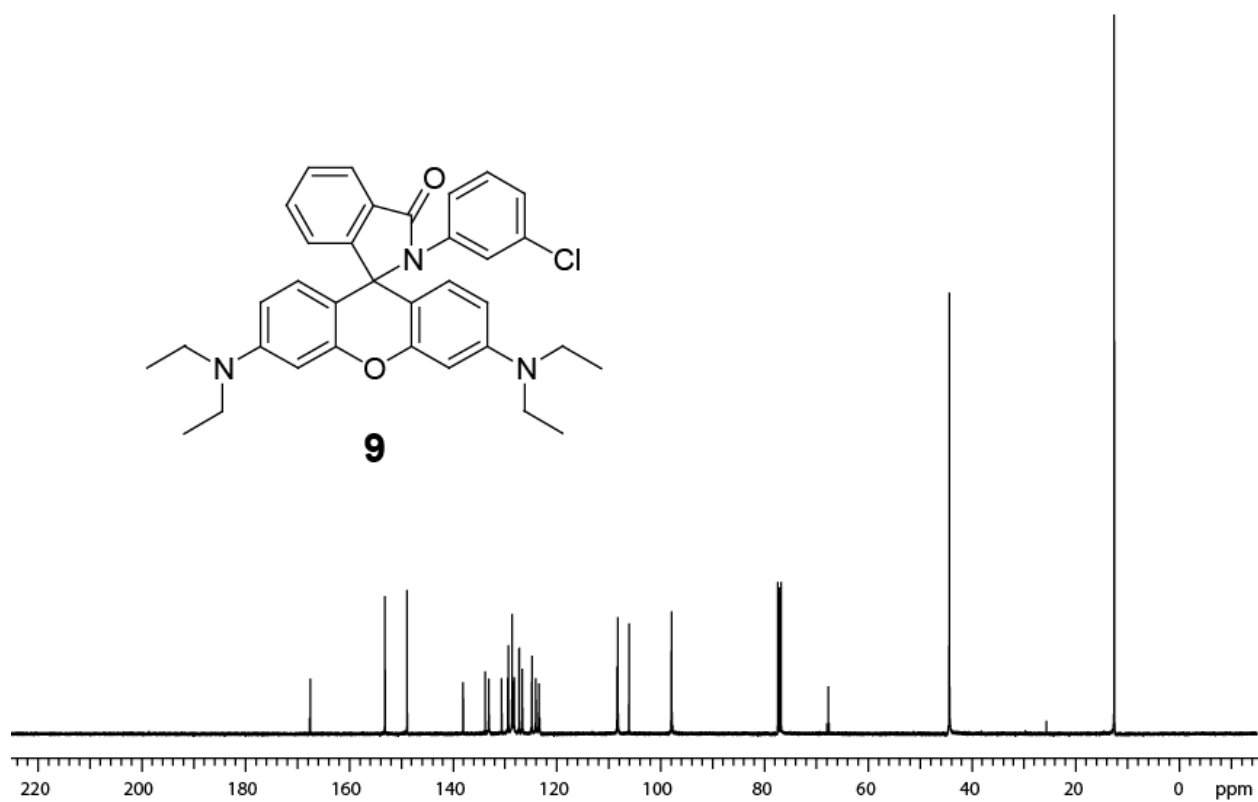

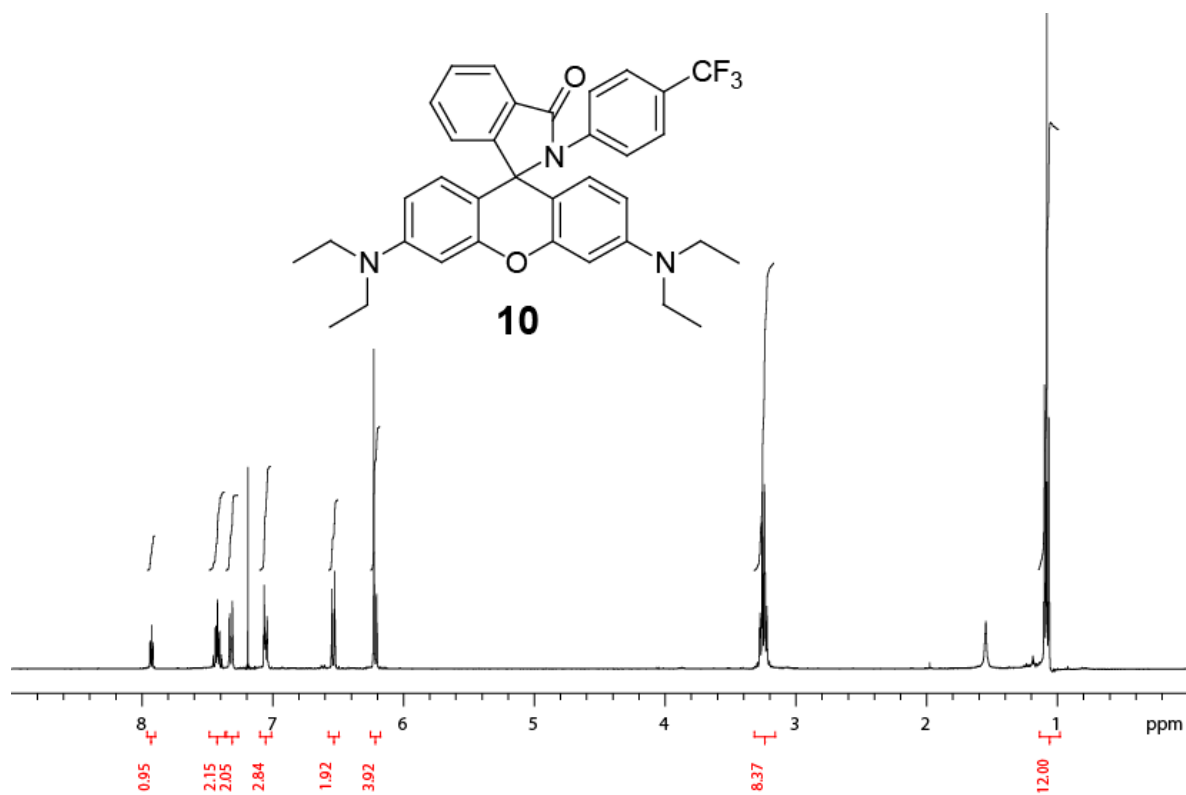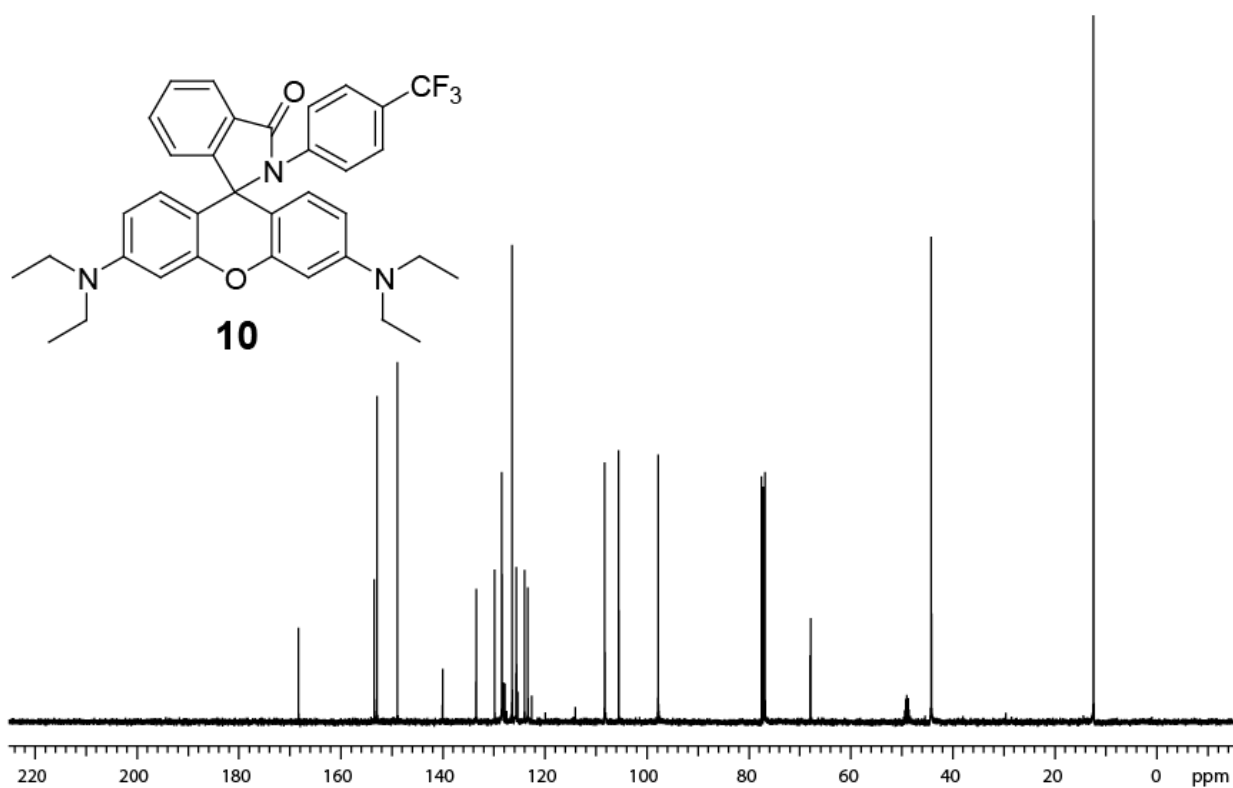

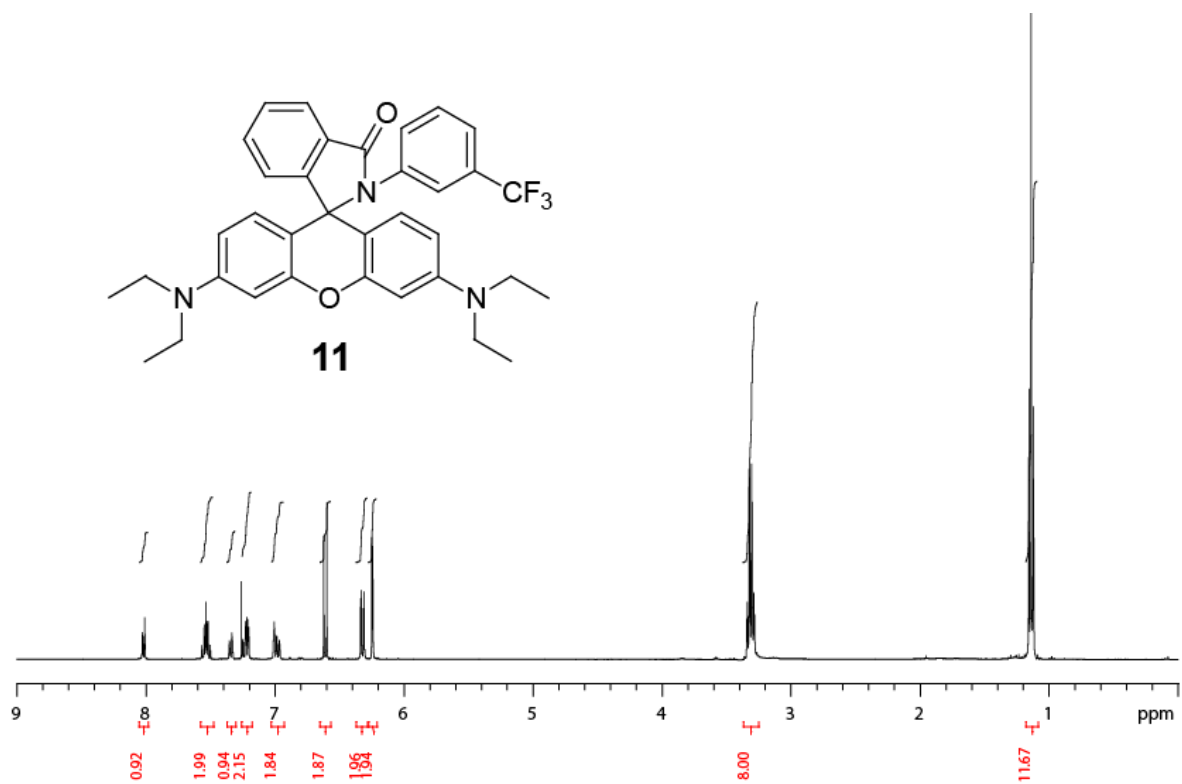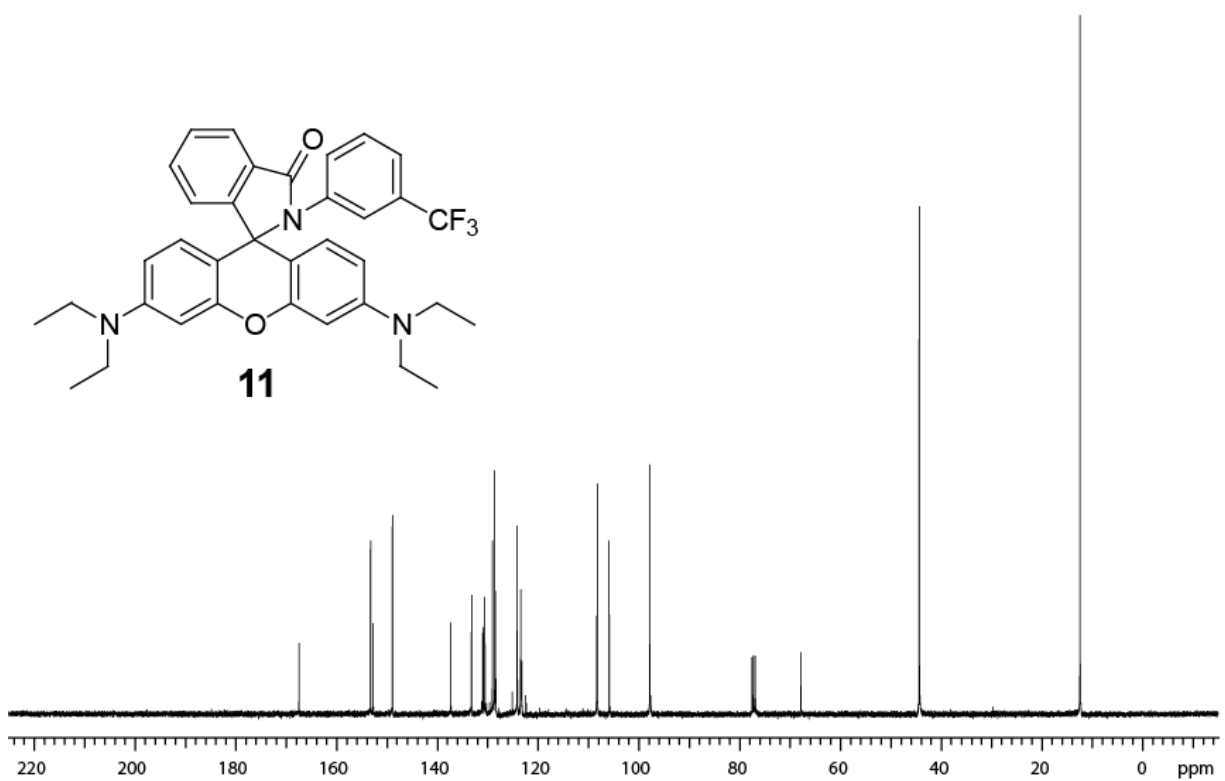

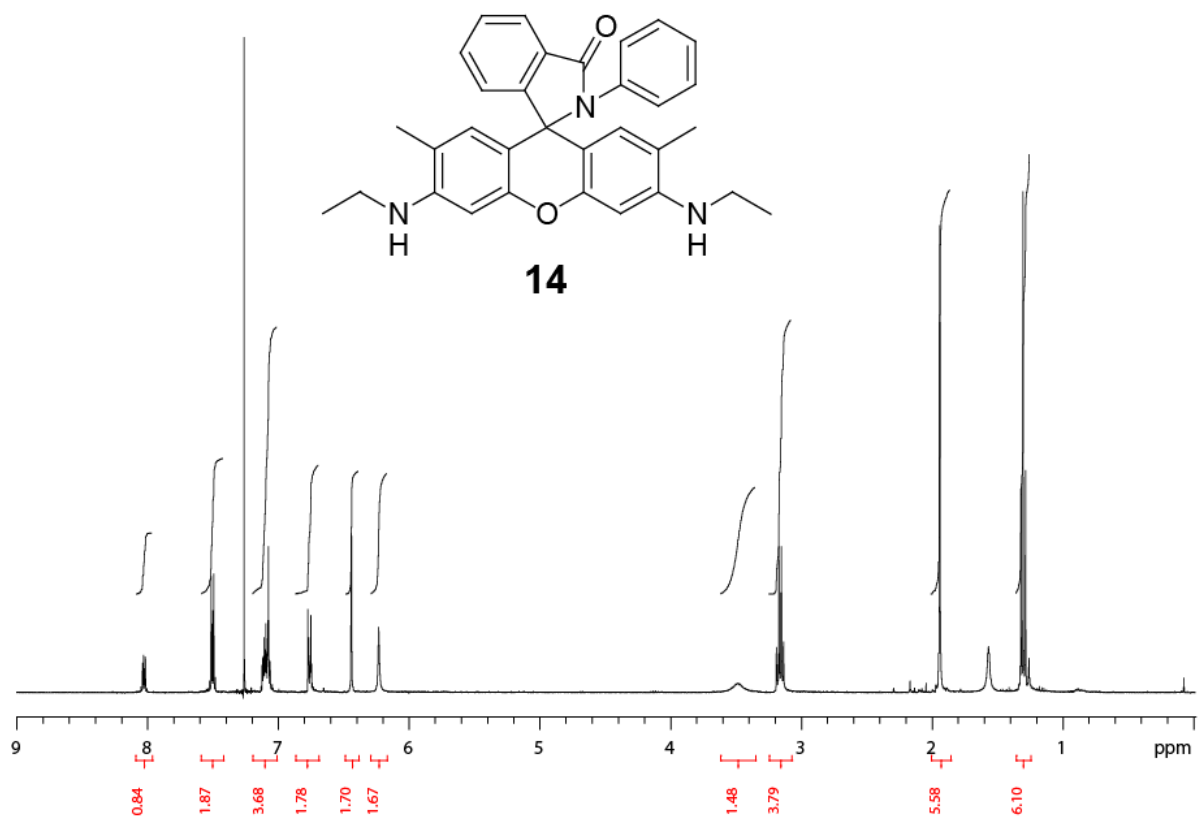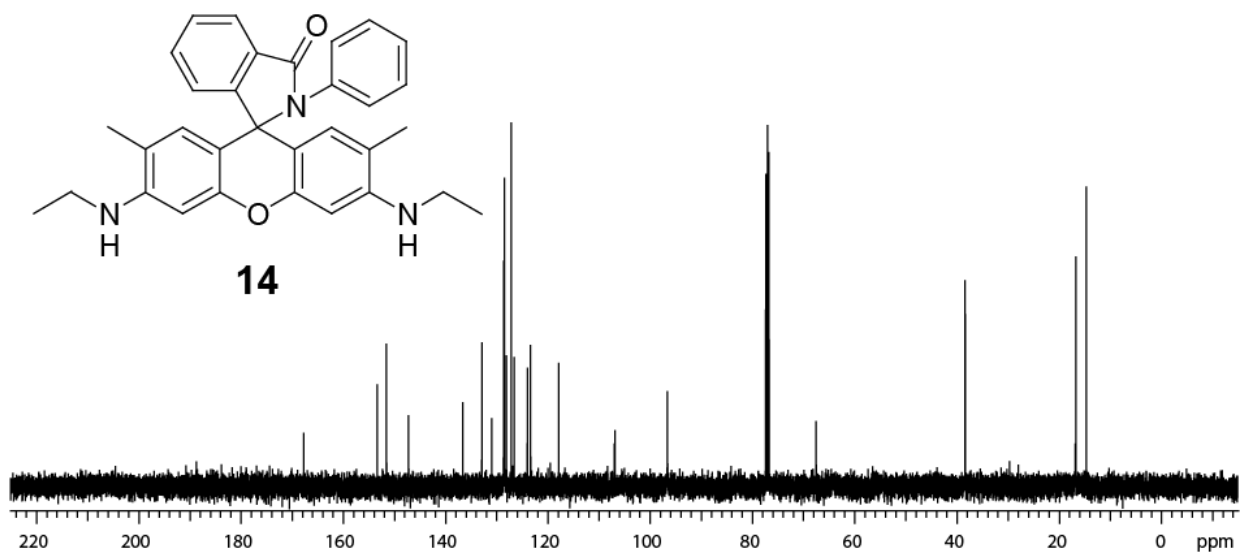



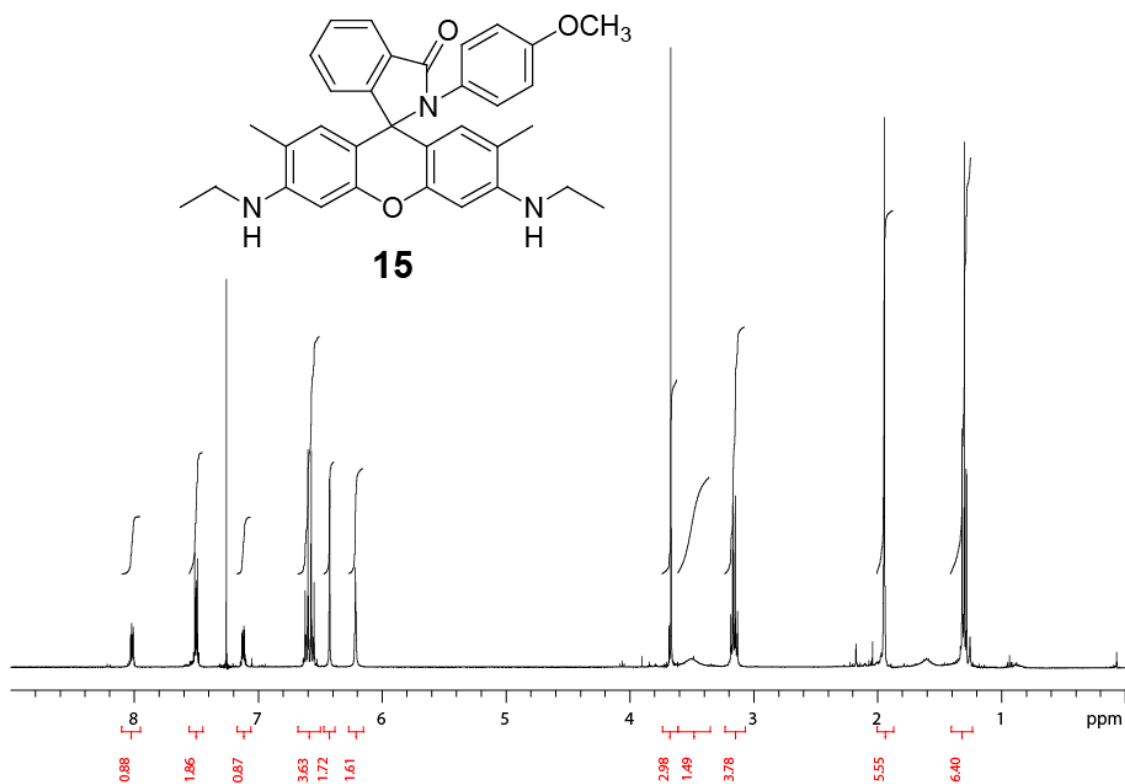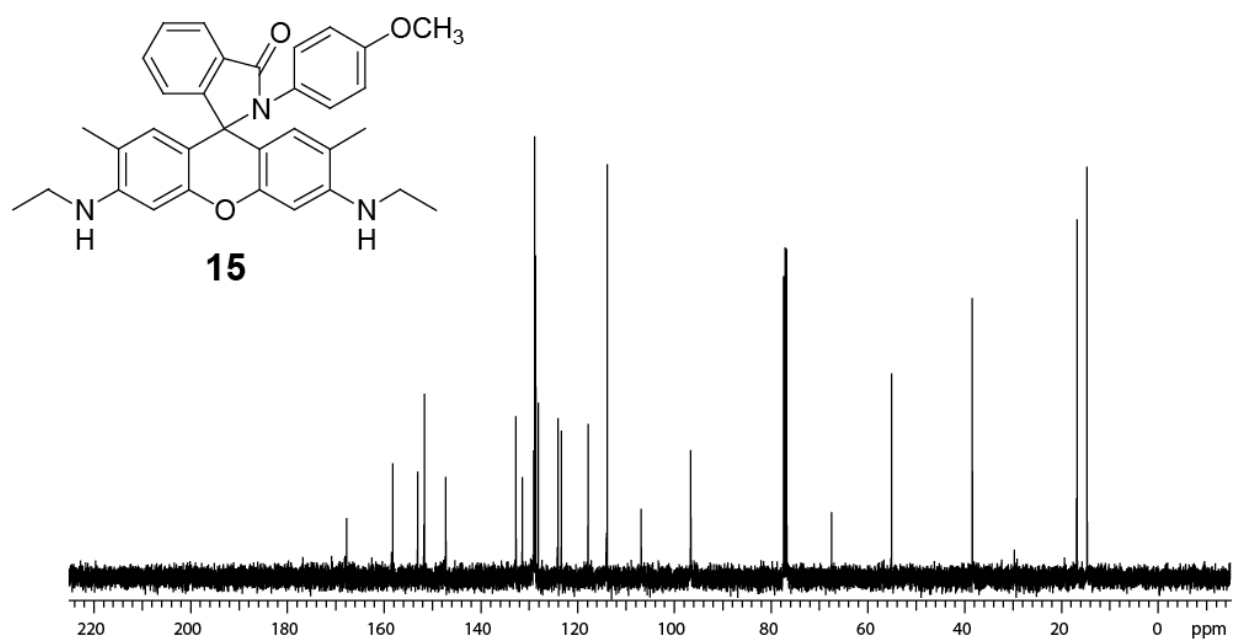

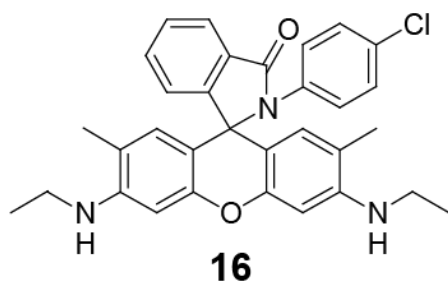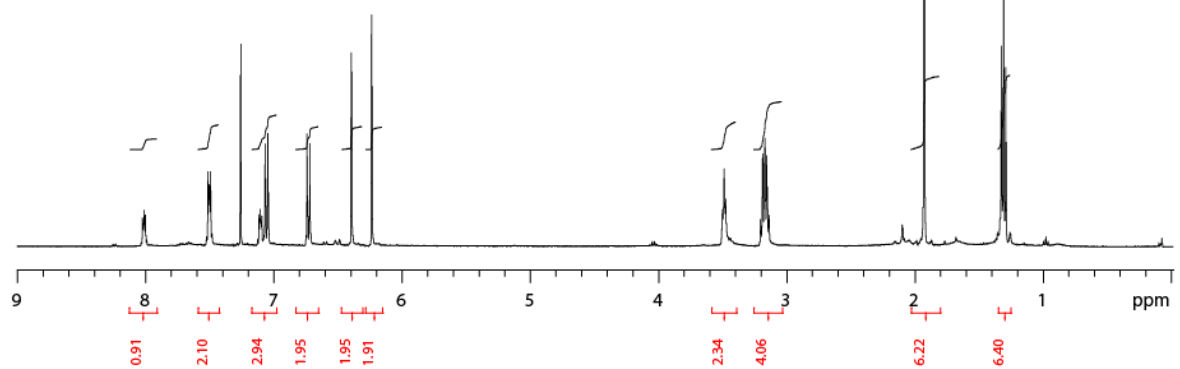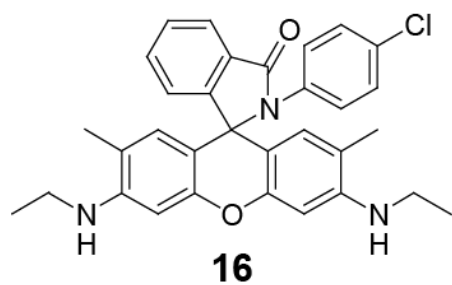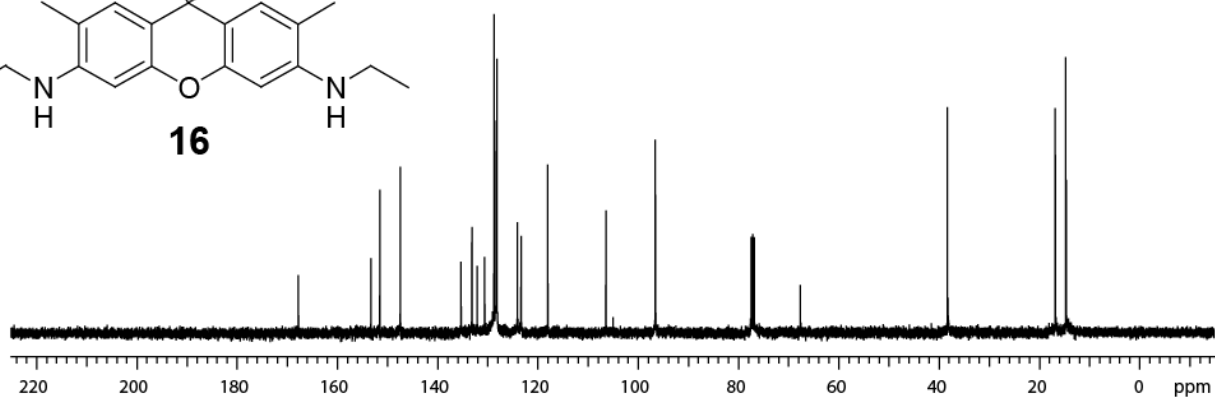

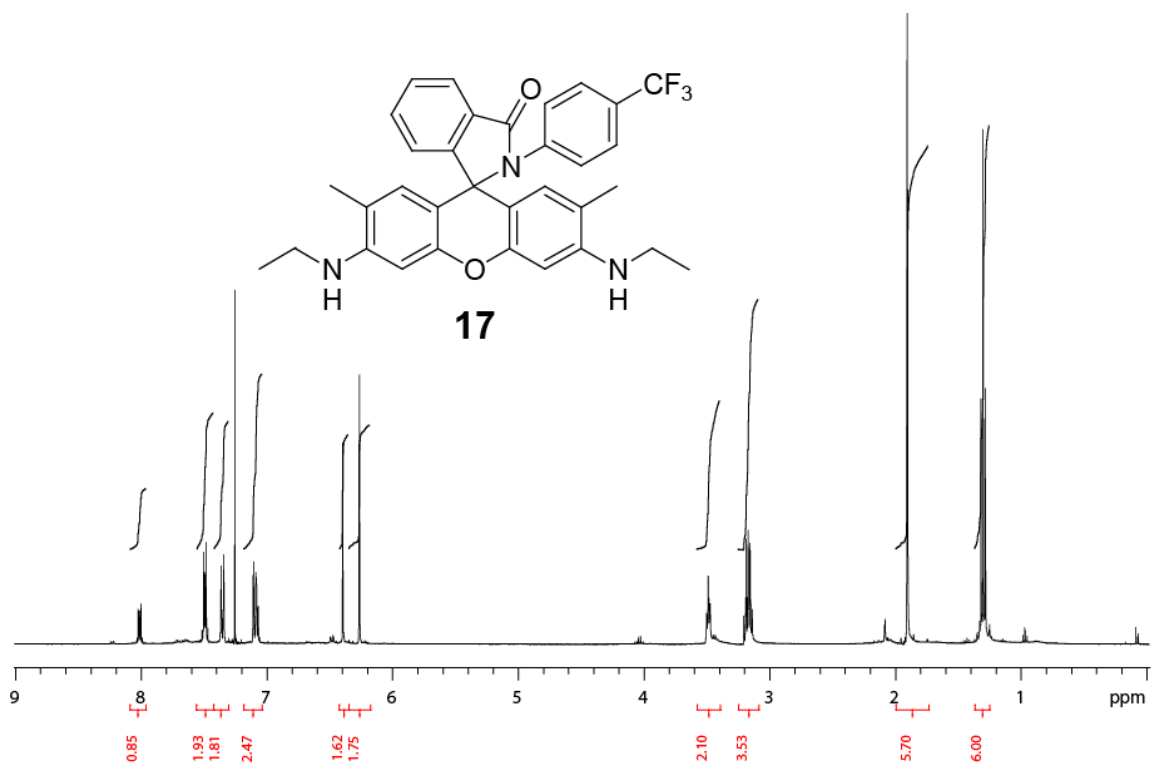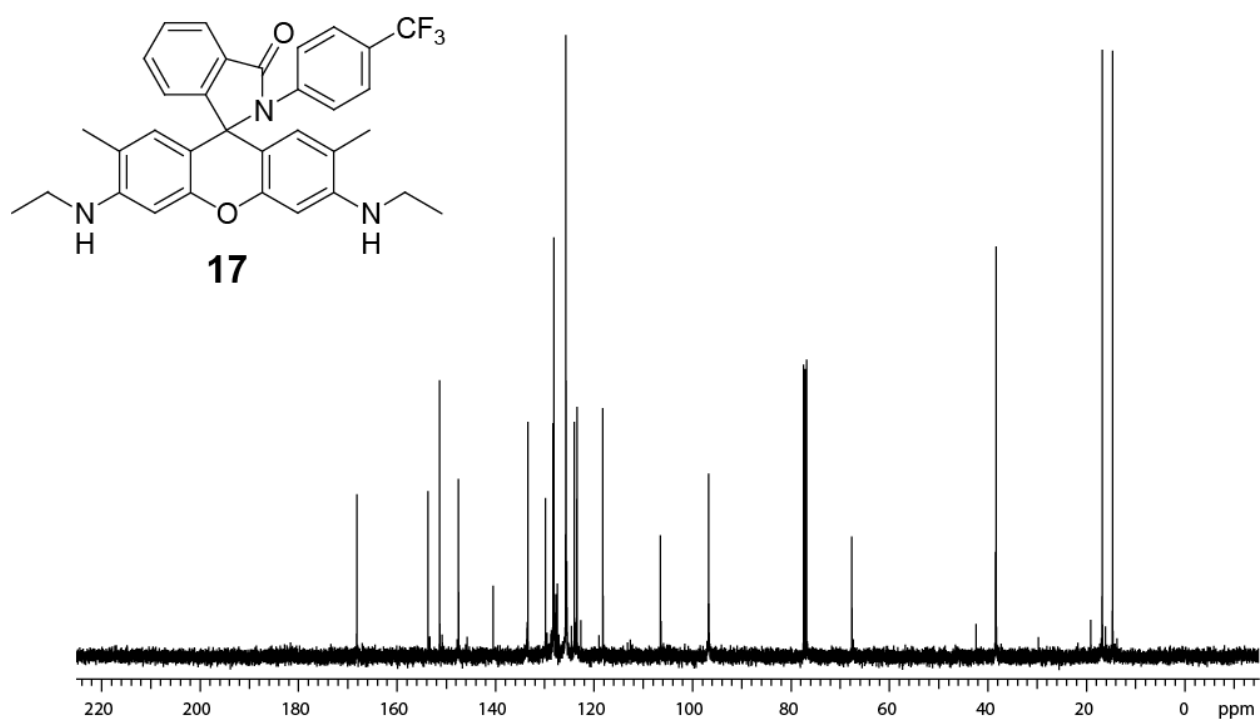

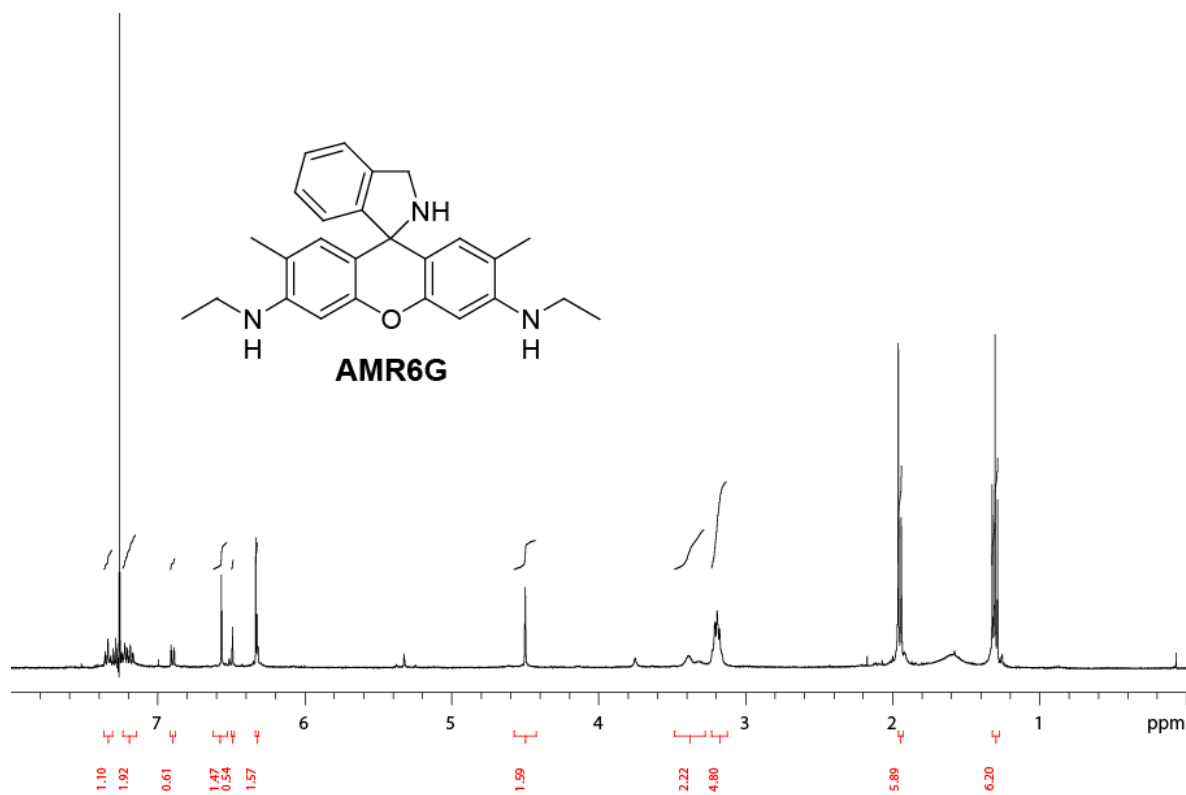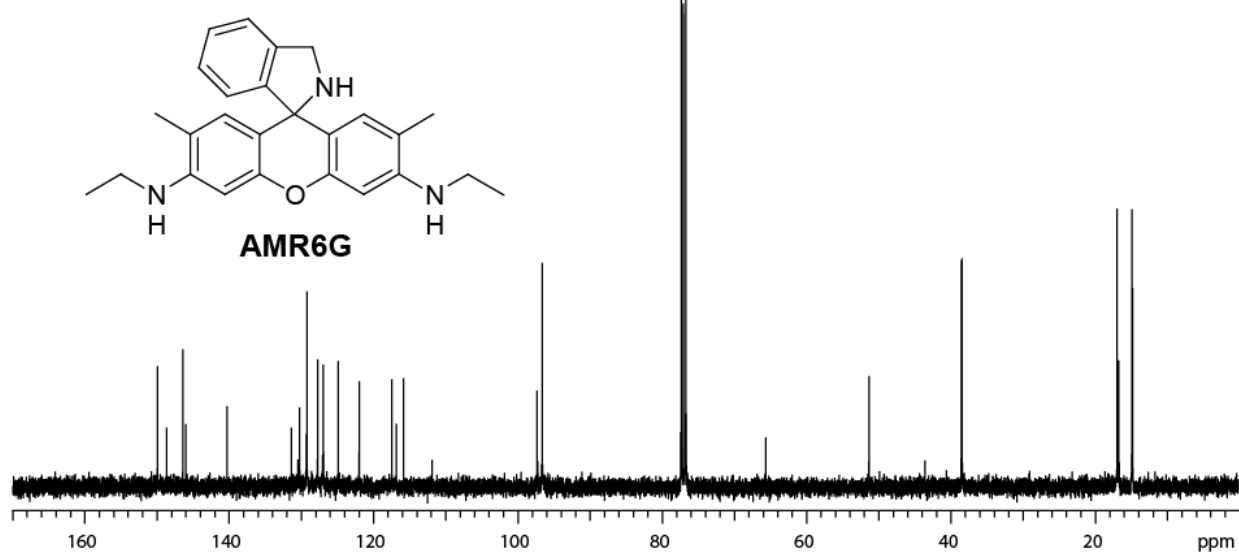

File: exp

Pulse Sequence: DEPT

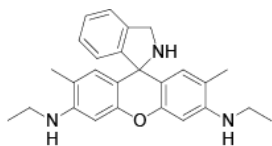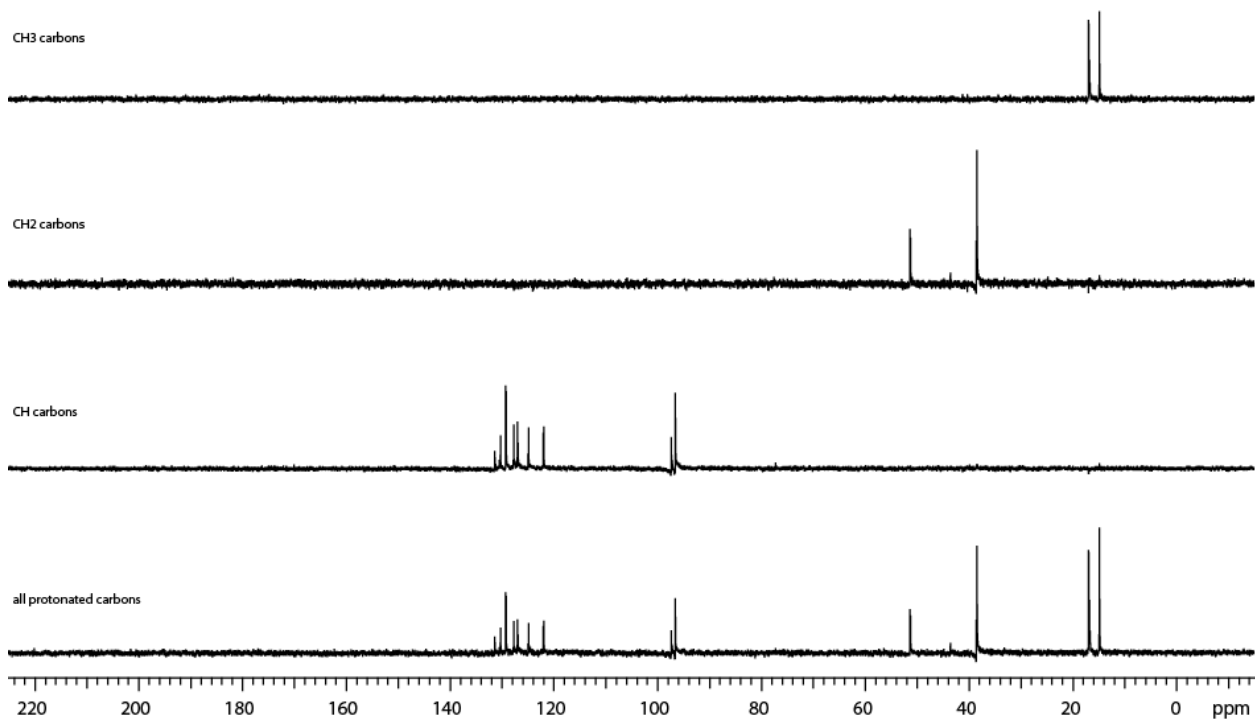

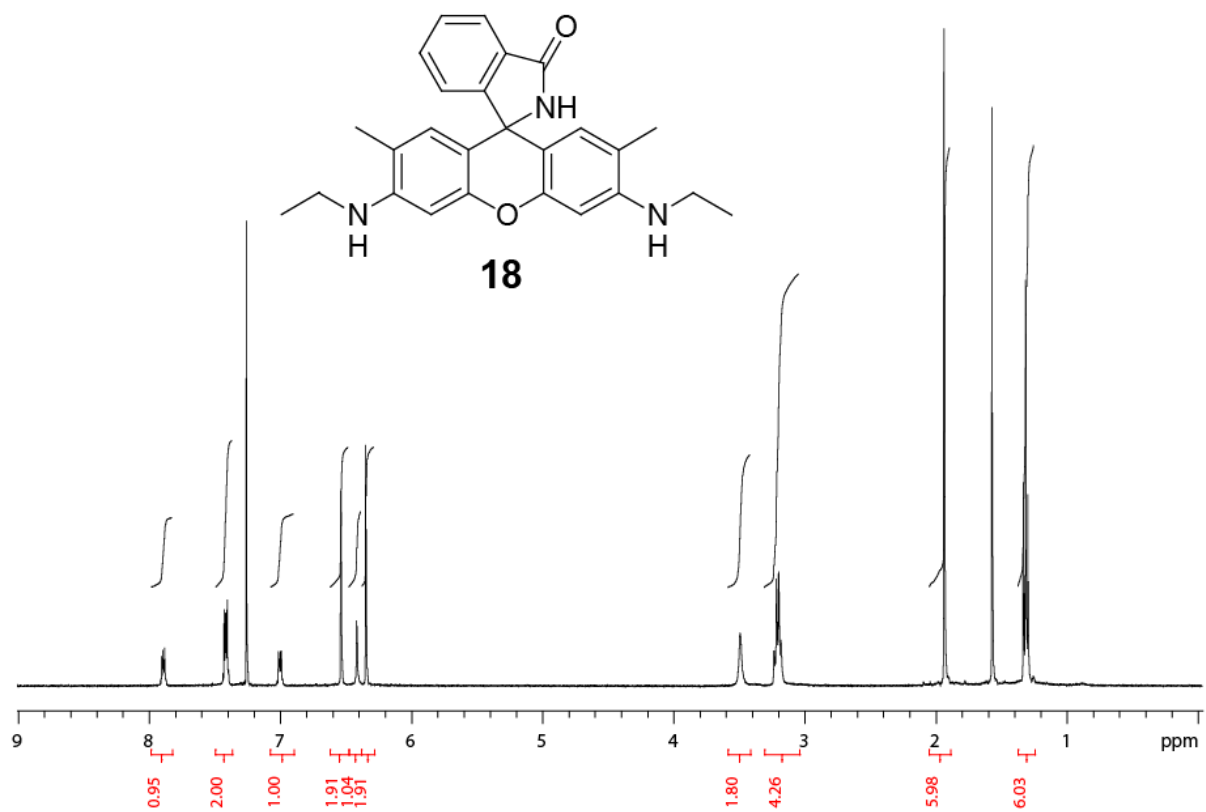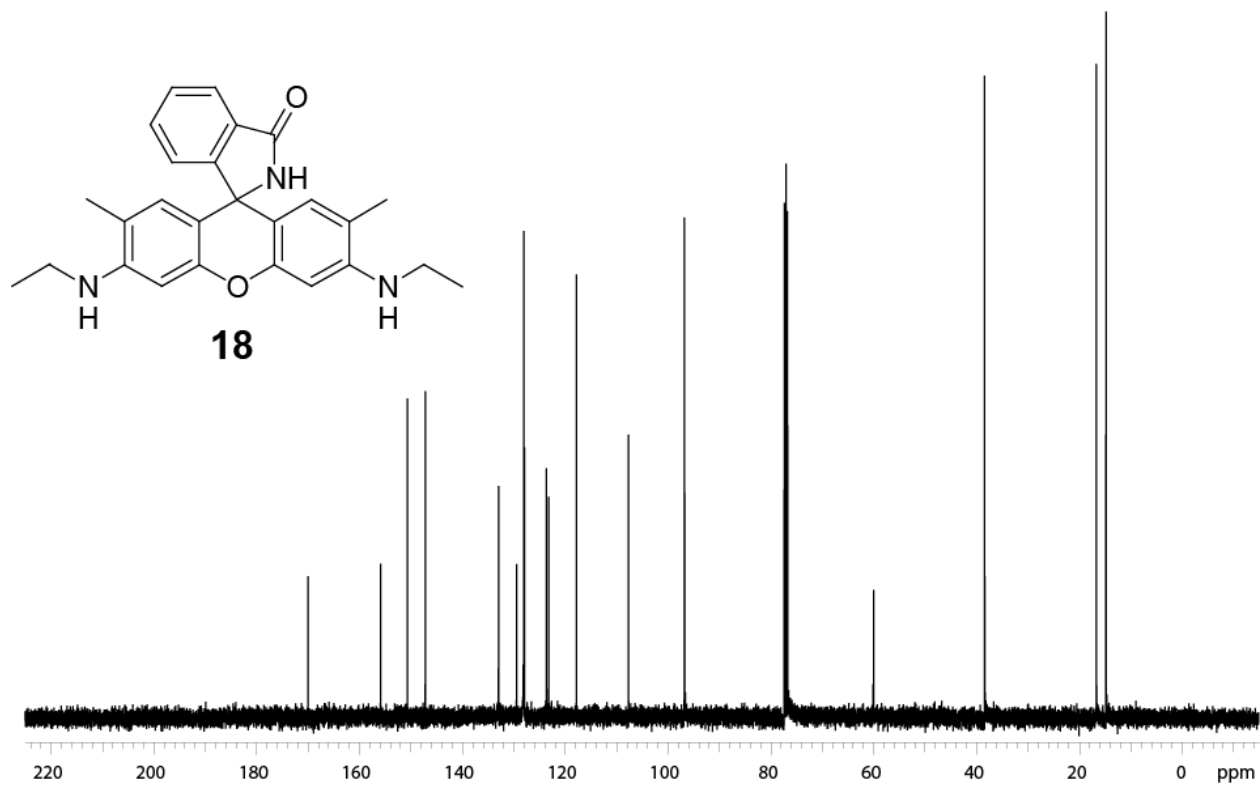

Supplement: Supplementary file 1 [file 4004377]
